# Supplementary material for: Selective lysine modification of native peptides via aza-Michael addition
Source: Royal Society of Chemistry journal article supplement (doi:10.1039/c7ob01866e), 2017-01-01
Supplement: c7ob01866e1.pdf [file c7ob01866e1.pdf]

## Supplementary Information

### Selective lysine modification of native peptides via aza-Michael addition

Hongli Chen,\* Rong Huang, Zhihong Li, Wei Zhu, Jiakang Chen, Yuexiong Zhan, Biao Jiang\*

*Shanghai Institute for Advanced Immunochemical Studies, ShanghaiTech University, Shanghai, 201210, P.R.China*

#### Chemical synthesis and characterization:

##### General information:

All chemical reagents were of analytical grade, used as supplied without further purification unless indicated. NMR spectra were recorded on a Bruker-500 instrument. Chemical shifts were given in ppm with respect to referenced solvent peaks. Spectra were analyzed with MestReNova. High-resolution mass spectra (HRESIMS) were obtained on an Agilent Technologies 6230 Accurate Mass TOF LC/MS instrument or Thermo fisher EASY1000-Fusion instrument and were reported as m/z (relative intensity). HPLC was performed using Waters 1525. MS<sup>2</sup> were recorded on Thermo fisher EASY1000-Fusion instrument.

##### Synthetic procedures

##### General procedure for the synthesis of vinylsulfonamides 1-10

To a stirred solution of amine (1 eq.) and trimethylamine (3 eq.) in DCM at 0°C, 2-chloroethanesulfonyl chloride (2.5 eq.) was added slowly. The resulting mixture was stirred at 0°C to room temperature (r.t.) until the amine was consumed as determined by TLC. The reaction was quenched with water and the mixture was extracted with DCM. The combined organic extracts were washed with brine and dried over anhydrous Na<sub>2</sub>SO<sub>4</sub>. The solvent was removed under vacuum and the residue was purified by column chromatography.

##### Characterization details for compound 1-10:

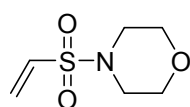

**1**

**4-(vinylsulfonyl)morpholine (1):** <sup>1</sup>H NMR (500 MHz, Chloroform-*d*) δ 6.44 – 6.31 (m, 1H), 6.22 – 6.10 (m, 1H), 6.04 (dt, *J* = 10.2, 5.1 Hz, 1H), 3.67 (dq, *J* = 9.4, 4.7 Hz, 4H), 3.03 (dq, *J* = 9.4, 4.7 Hz, 4H); <sup>13</sup>C NMR (126 MHz, CDCl<sub>3</sub>) δ 131.51, 129.80, 66.09, 45.50. HRMS (ESI) [M+H]<sup>+</sup> Calculated for C<sub>6</sub>H<sub>12</sub>NO<sub>3</sub>S, 178.0538, Found 178.0540.

<sup>1</sup>H NMR of compound 1

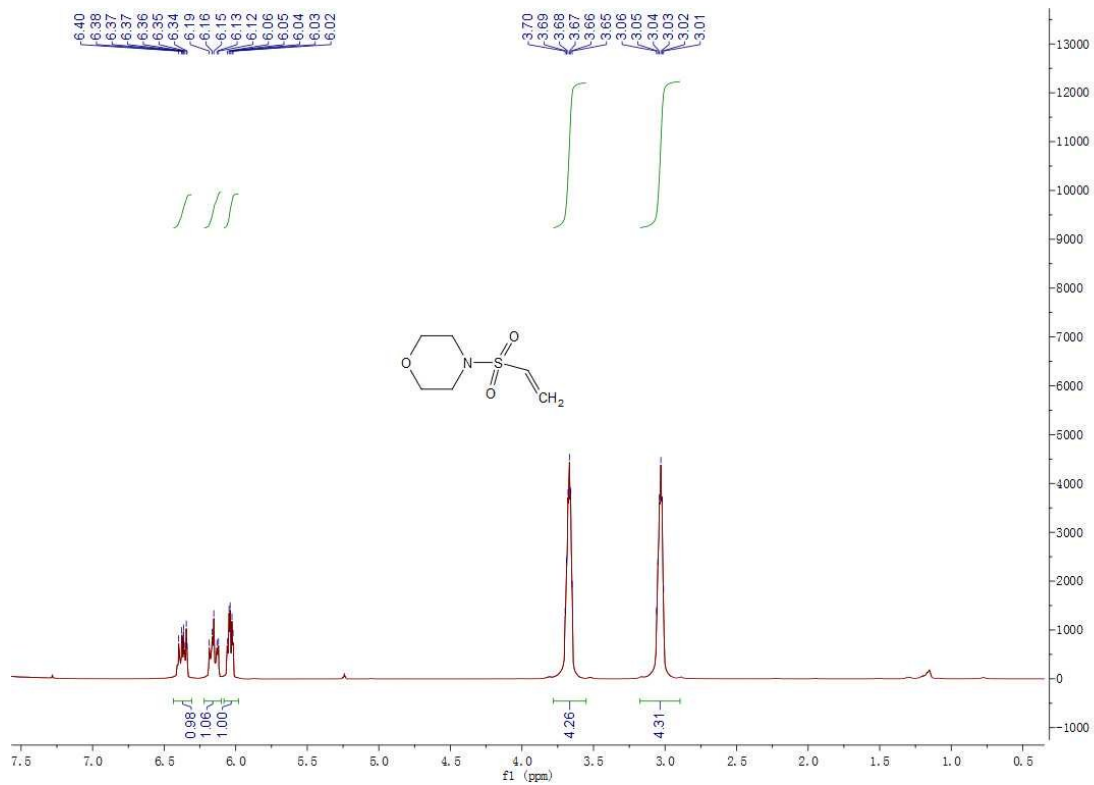

<sup>13</sup>C NMR of compound 1

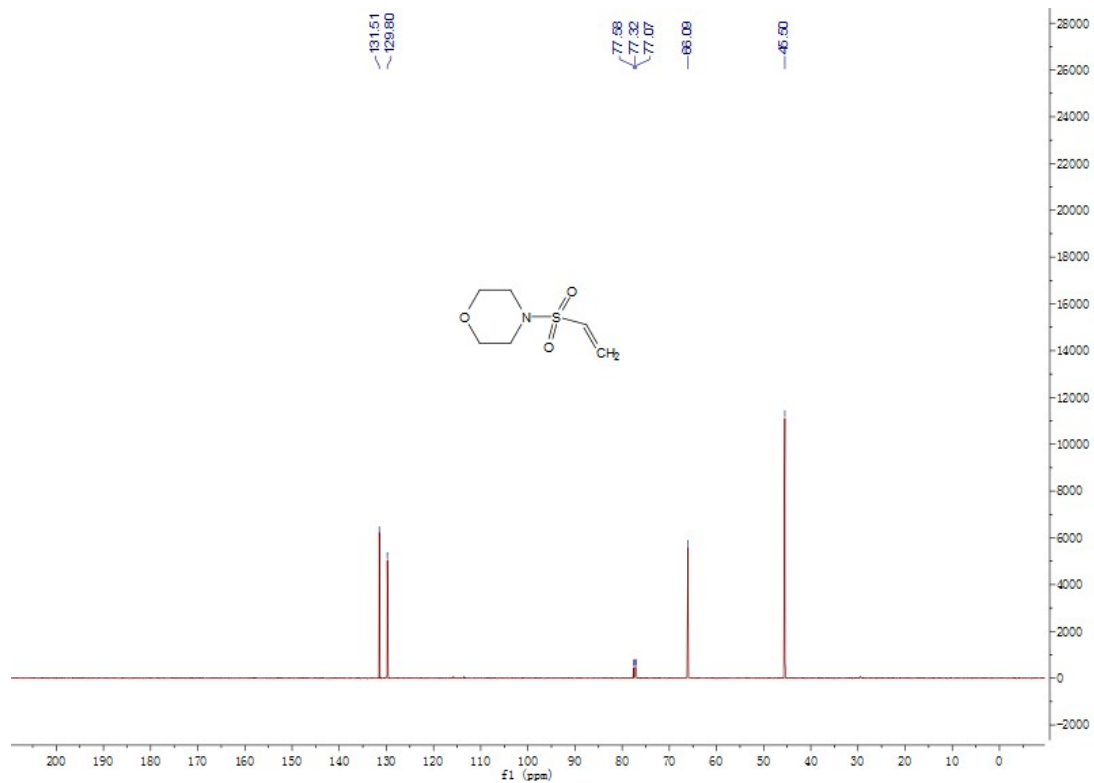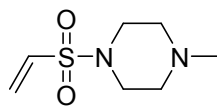

**2**

**1-methyl-4-(vinylsulfonyl)piperazine (2):**  $^1\text{H}$  NMR (500 MHz, Chloroform-*d*)  $\delta$  6.22 (ddd,  $J = 16.7, 9.9, 7.6$  Hz, 1H), 5.98 (dd,  $J = 16.6, 11.1$  Hz, 1H), 5.84 (t,  $J = 9.2$  Hz, 1H), 3.03 – 2.84 (m, 4H), 2.25 (m,  $J = 9.5, 4.7$  Hz, 4H), 2.07 (s, 3H);  $^{13}\text{C}$  NMR (126 MHz,  $\text{CDCl}_3$ )  $\delta$  132.03, 128.91, 54.05, 45.69, 45.35. HRMS (ESI)  $[\text{M}+\text{H}]^+$  Calculated for  $\text{C}_7\text{H}_{15}\text{N}_2\text{O}_2\text{S}$ , 191.0854, Found 191.0918.

$^1\text{H}$  NMR of compound **2**

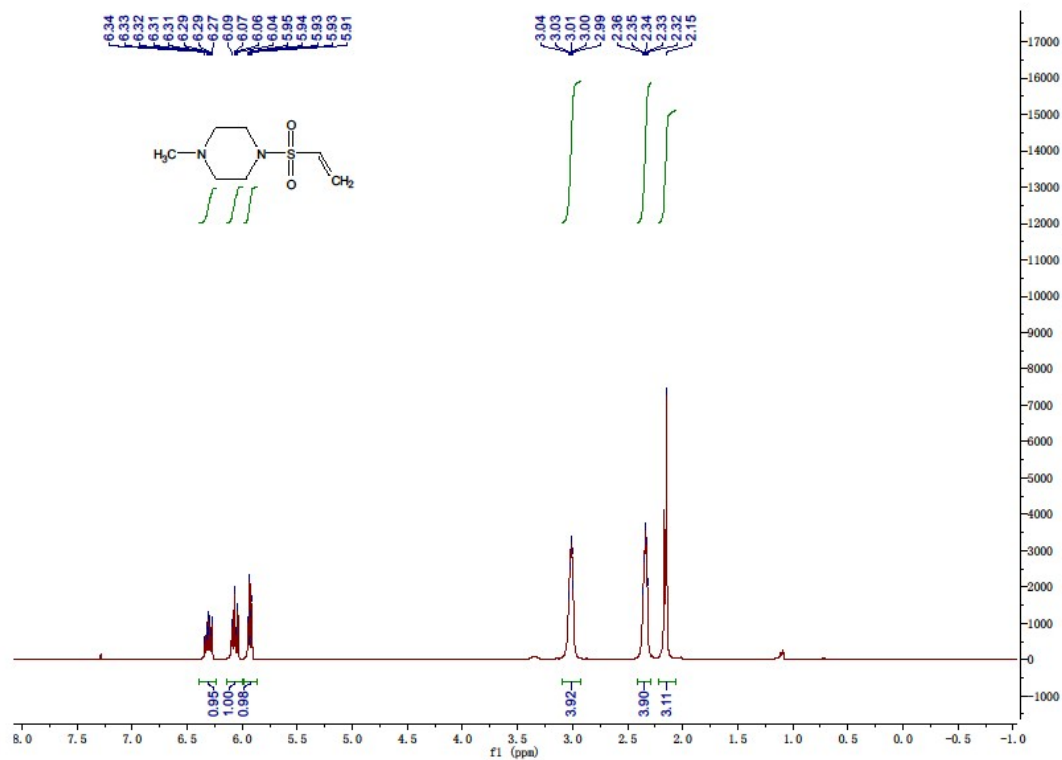

$^{13}\text{C}$  NMR of compound **2**

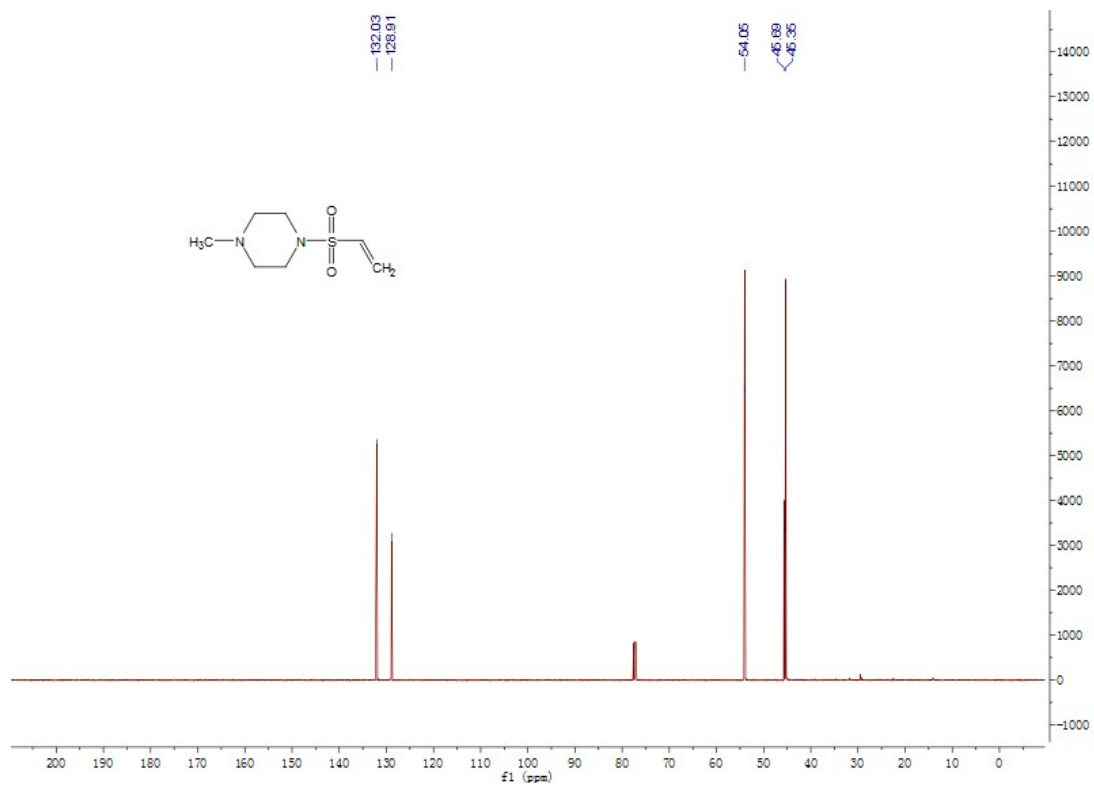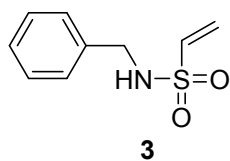

*N*-benzylethanesulfonamide (**3**):  $^1\text{H}$  NMR (500 MHz, Chloroform-*d*)  $\delta$  7.42 – 7.30 (m, 5H), 6.49 (dd,  $J = 16.6, 9.9$  Hz, 1H), 6.27 (d,  $J = 16.6$  Hz, 1H), 5.94 (d,  $J = 9.9$  Hz, 1H), 4.77 (s, 1H), 4.23 (d,  $J = 6.0$  Hz, 2H). HRMS (ESI)  $[\text{M}+\text{H}]^+$  Calculated for  $\text{C}_9\text{H}_{12}\text{NO}_2\text{S}$ , 198.0589, Found 198.0582.

$^1\text{H}$  NMR of compound **3**

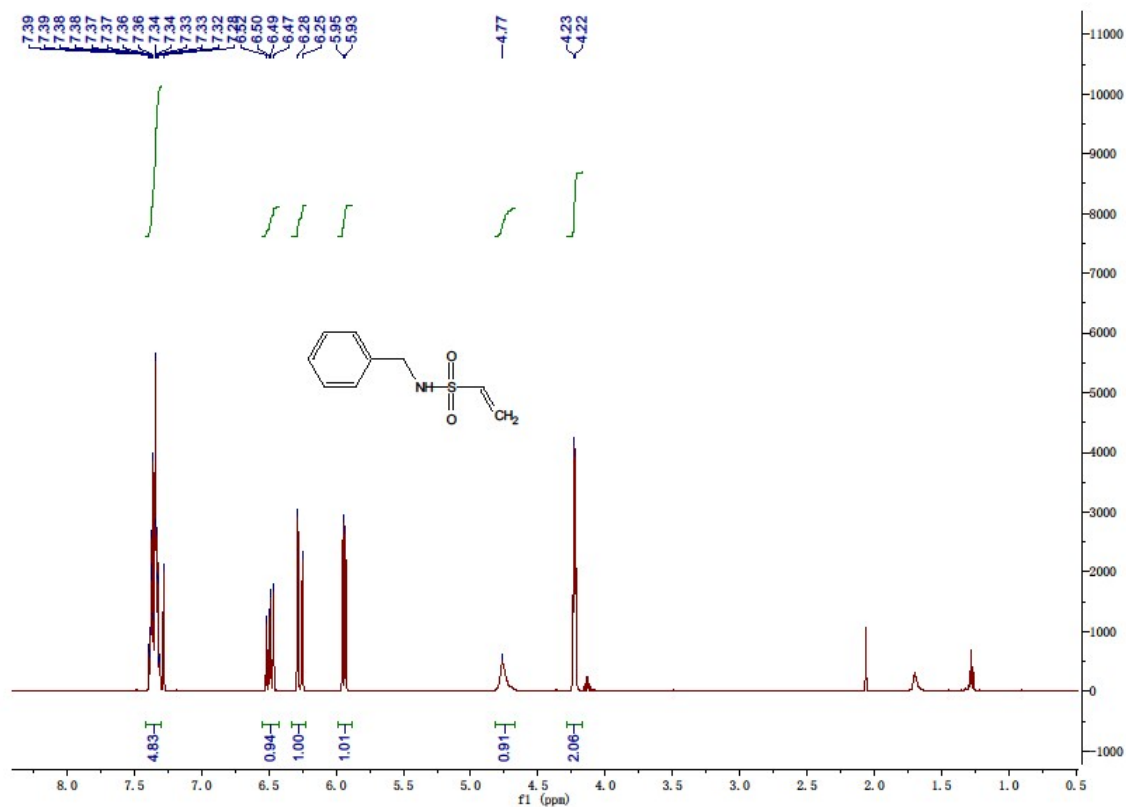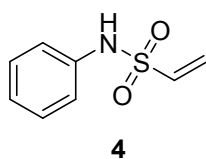

**N-phenylethanesulfonamide (4):**  $^1\text{H}$  NMR (500 MHz, Chloroform-*d*)  $\delta$  7.34 (tt,  $J = 7.2, 2.0$  Hz, 2H), 7.24 – 7.14 (m, 3H), 6.58 (ddd,  $J = 16.6, 10.0, 1.4$  Hz, 1H), 6.30 (dd,  $J = 16.5, 2.6$  Hz, 1H), 5.98 (dd,  $J = 9.8, 2.3$  Hz, 1H);  $^{13}\text{C}$  NMR (126 MHz,  $\text{CDCl}_3$ )  $\delta$  136.41, 135.02, 129.50, 128.60, 125.32, 121.04, 77.40, 77.14, 76.89. HRMS (ESI)  $[\text{M}+\text{H}]^+$  Calculated for  $\text{C}_8\text{H}_{10}\text{NO}_2\text{S}$ , 184.0432, Found 184.1090  $[\text{M}+\text{H}]^+$ , 206.0950  $[\text{M}+\text{Na}]^+$ .

$^1\text{H}$  NMR of compound 4

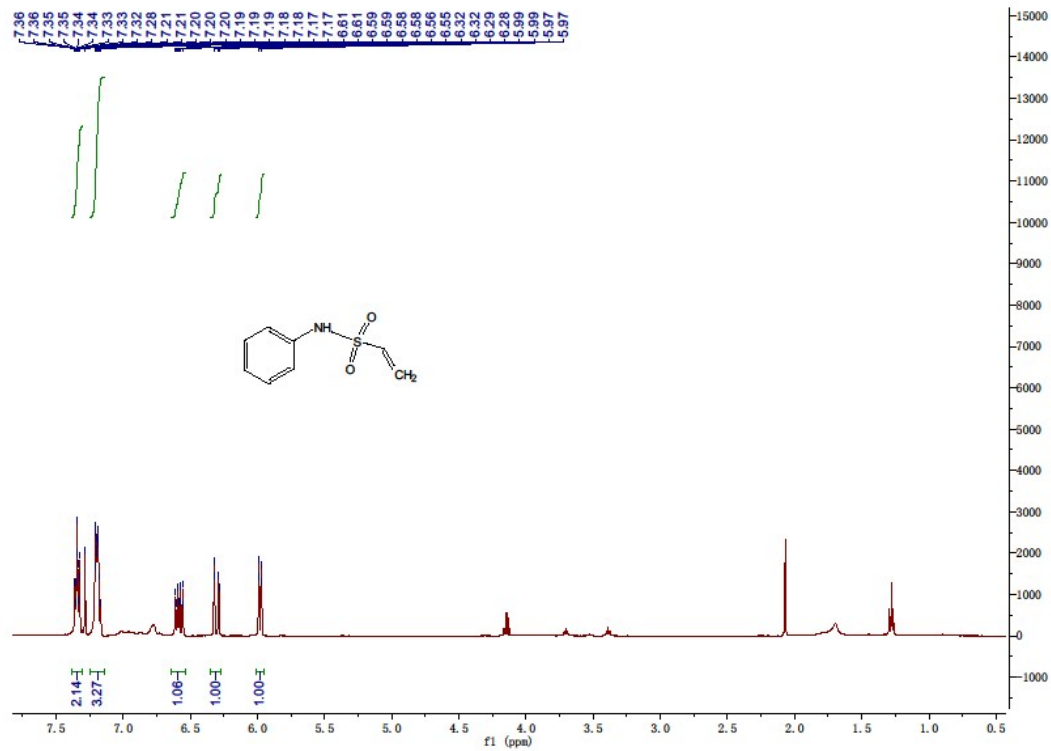

### <sup>13</sup>C NMR of compound 4

artical  
CHE-C-630

136.41  
135.02  
129.50  
128.60  
125.32  
121.04

77.40  
77.14  
76.89

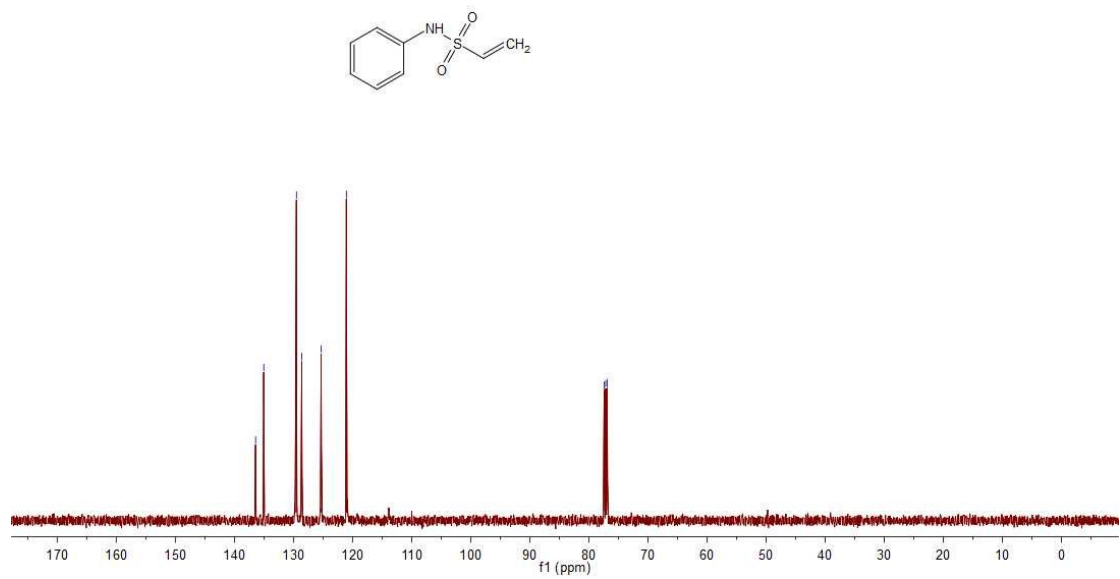

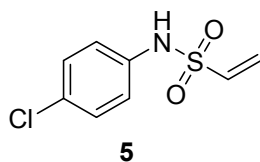

***N*-(4-chlorophenyl)ethenesulfonamide (5):**  $^1\text{H}$  NMR (500 MHz, Chloroform-*d*)  $\delta$  7.26 (d,  $J$  = 8.6 Hz, 2H), 7.15 (d,  $J$  = 8.8 Hz, 2H), 6.58 (dd,  $J$  = 16.5, 9.9 Hz, 1H), 6.25 (d,  $J$  = 16.5 Hz, 1H), 5.98 (d,  $J$  = 9.9 Hz, 1H);  $^{13}\text{C}$  NMR (126 MHz,  $\text{CDCl}_3$ )  $\delta$  134.99, 134.65, 130.77, 129.50, 129.08, 122.43. HRMS (ESI)  $[\text{M}+\text{K}]^+$  Calculated for  $\text{C}_8\text{H}_8\text{ClNO}_2\text{SK}$  255.9601, Found 255.9520.

$^1\text{H}$  NMR of compound **5**

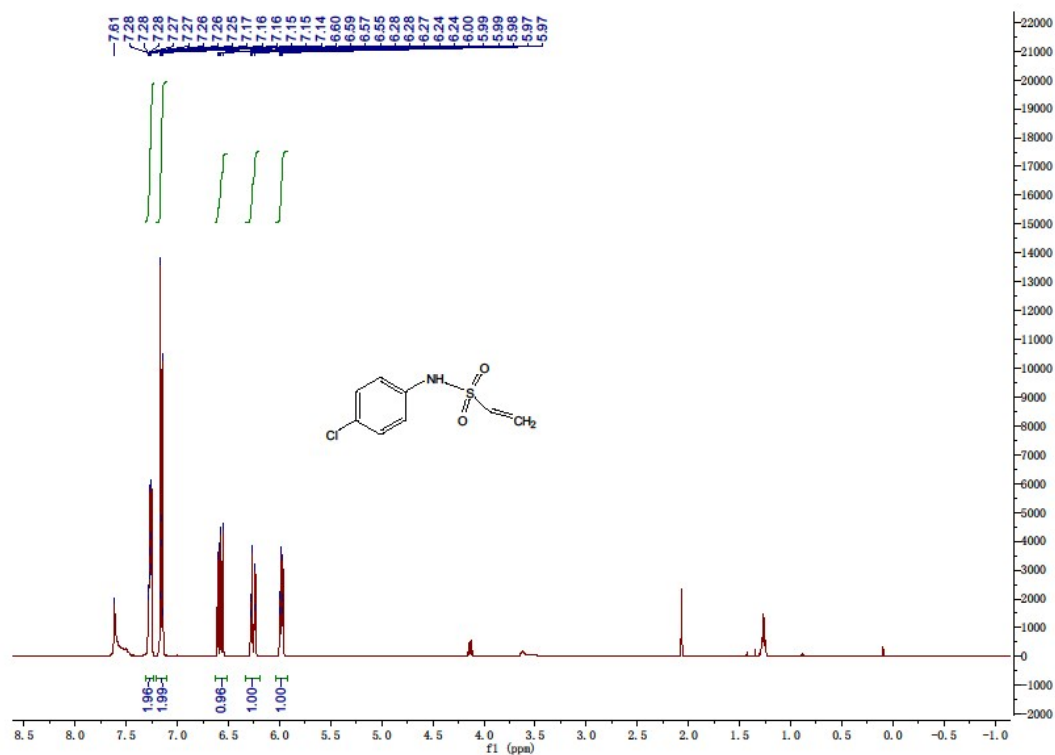

$^{13}\text{C}$  NMR of compound **5**

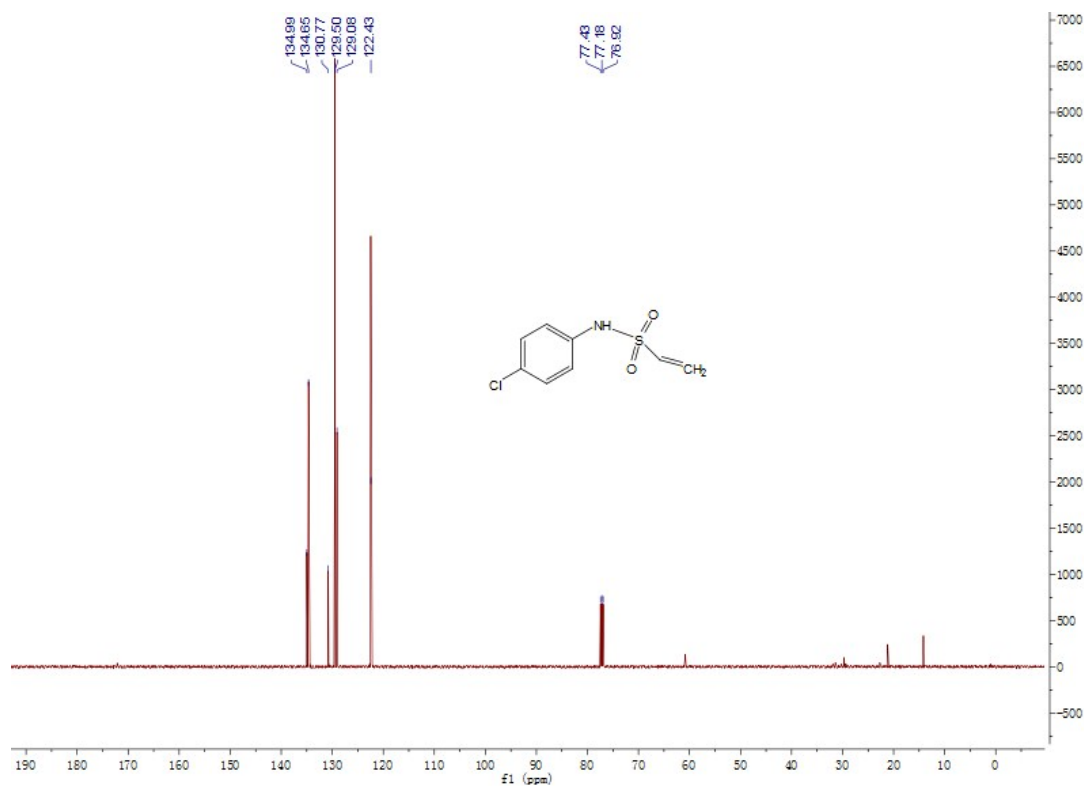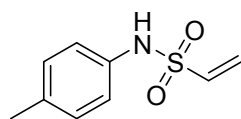

**6**

***N*-(*p*-tolyl)ethenesulfonamide (6):**  $^1\text{H NMR}$  (500 MHz, Chloroform-*d*)  $\delta$  7.17 – 7.08 (m, 5H), 7.05 (s, 1H), 6.58 (dd,  $J = 16.5, 9.9$  Hz, 1H), 6.25 (d,  $J = 16.5$  Hz, 1H), 5.95 (d,  $J = 9.9$  Hz, 1H), 2.33 (s, 3H);  $^{13}\text{C NMR}$  (126 MHz,  $\text{CDCl}_3$ )  $\delta$  135.36, 134.96, 133.57, 130.00, 128.37, 121.77, 20.86. HRMS (ESI)  $[\text{M}+\text{H}]^+$  Calculated for  $\text{C}_9\text{H}_{12}\text{NO}_2\text{S}$ , 198.0589, Found 198.0401  $[\text{M}+\text{H}]^+$ , 220.0218  $[\text{M}+\text{Na}]^+$ .  $^1\text{H NMR}$  of compound **6**



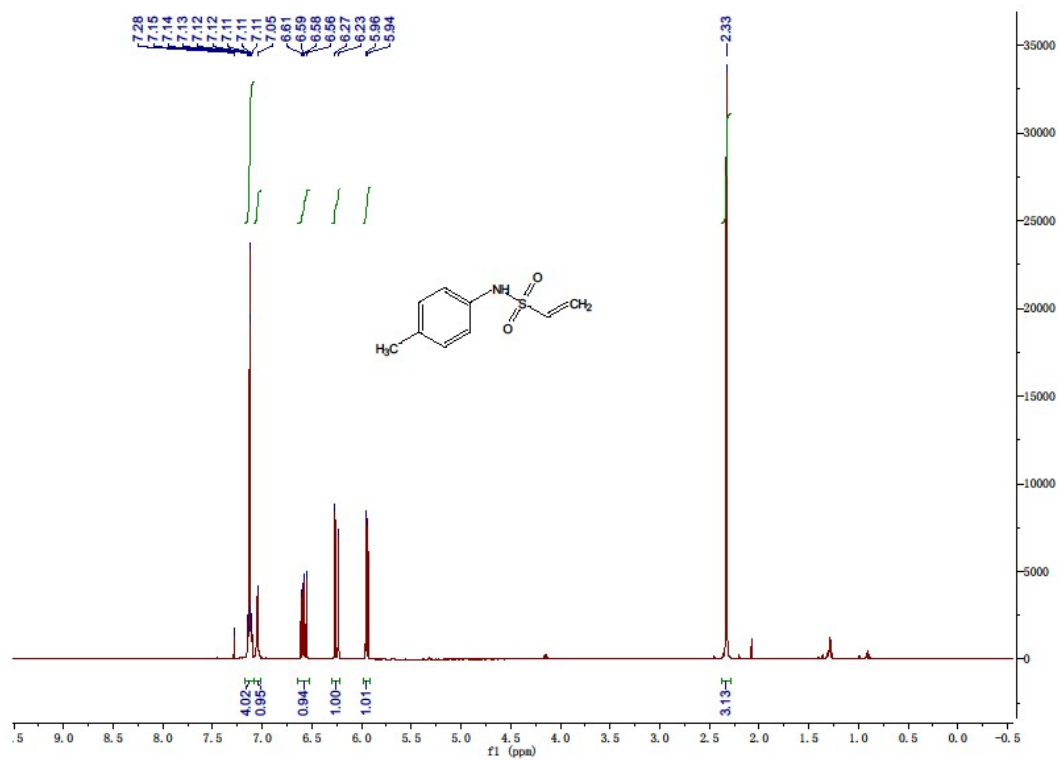

<sup>13</sup>C NMR of compound 6

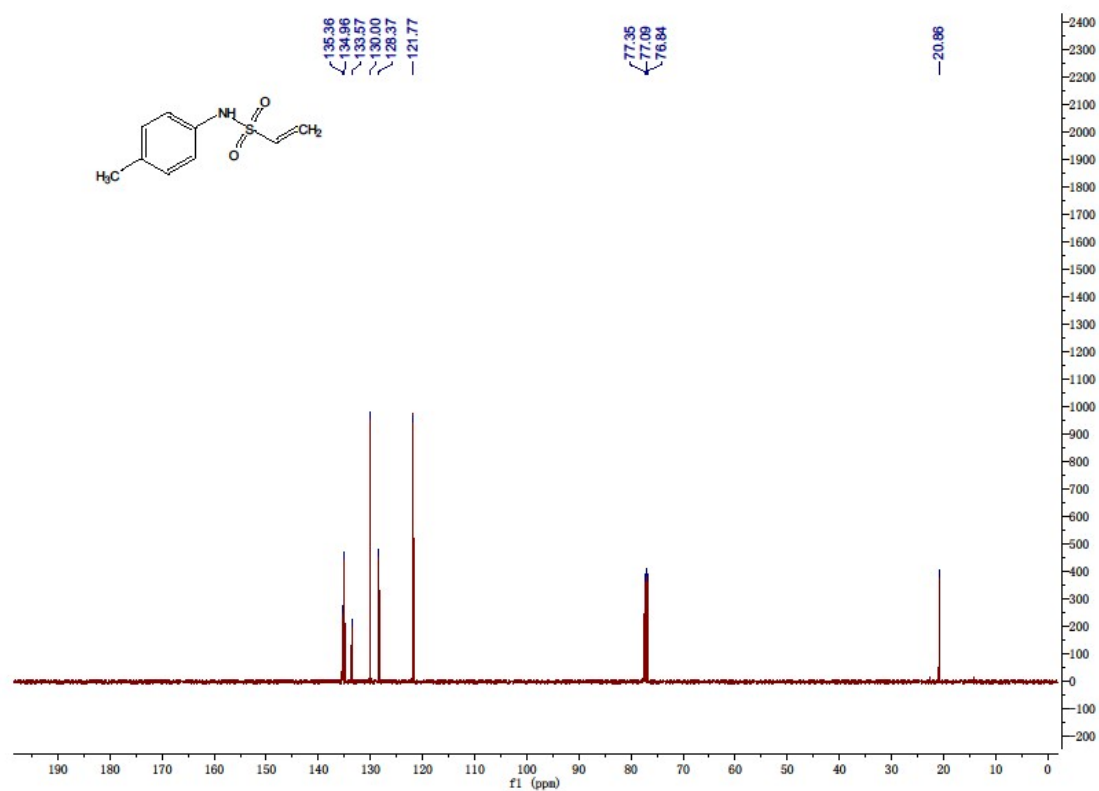

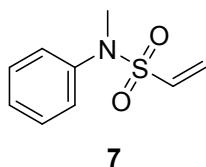

***N*-methyl-*N*-phenylethenesulfonamide (7):**  $^1\text{H}$  NMR (500 MHz, Chloroform-*d*)  $\delta$  7.43 – 7.25 (m, 5H), 6.47 (dd,  $J = 16.6, 9.9$  Hz, 1H), 6.21 (d,  $J = 16.6$  Hz, 1H), 6.03 (d,  $J = 10.0$  Hz, 1H), 3.26 (s, 3H);  $^{13}\text{C}$  NMR (126 MHz,  $\text{CDCl}_3$ )  $\delta$  141.20, 132.19, 129.16, 128.52, 128.51, 127.49, 126.63, 38.09. HRMS (ESI)  $[\text{M}+\text{H}]^+$  Calculated for  $\text{C}_9\text{H}_{12}\text{NO}_2\text{S}$ , 198.0589, Found 198.0249  $[\text{M}+\text{H}]^+$ , 220.0061  $[\text{M}+\text{Na}]^+$ .

$^1\text{H}$  NMR of compound 7

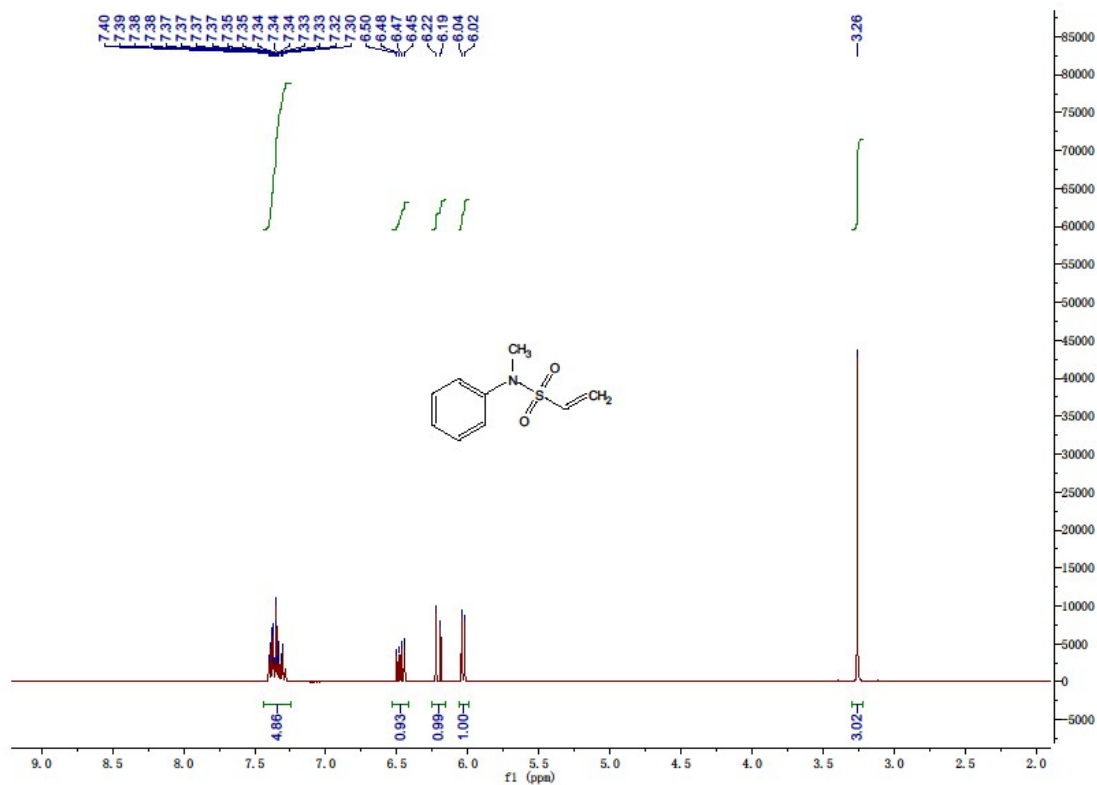

$^{13}\text{C}$  NMR of compound 7

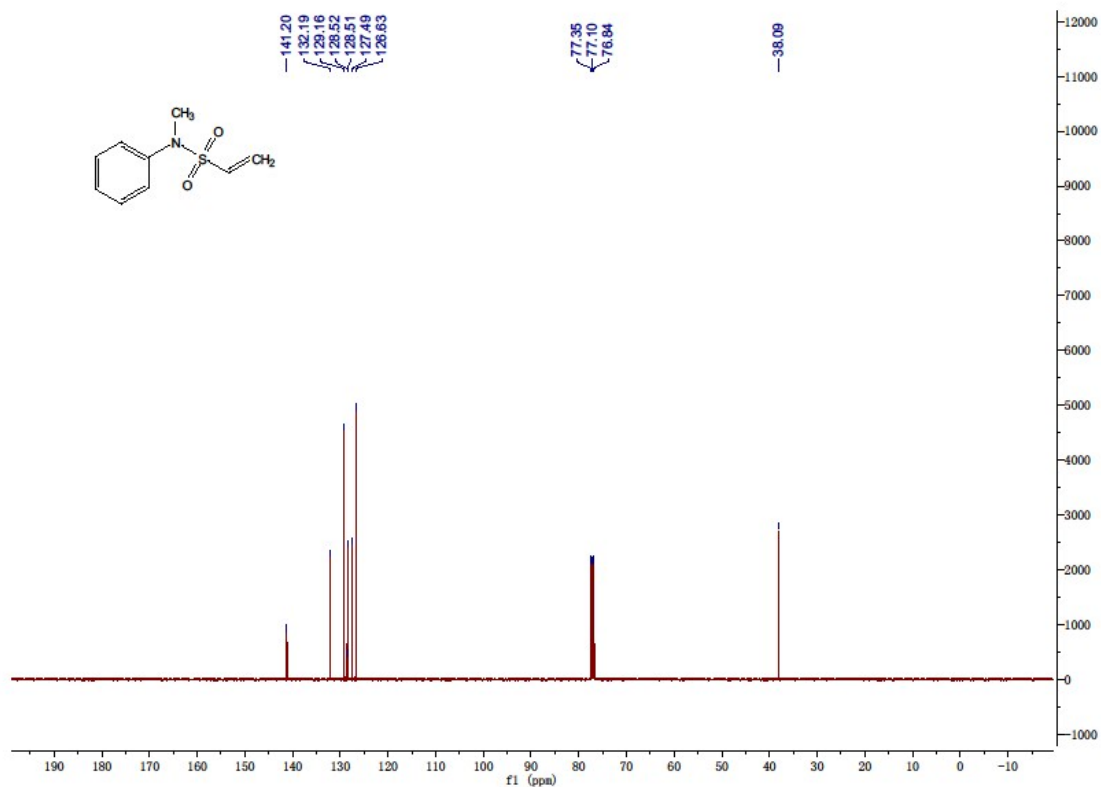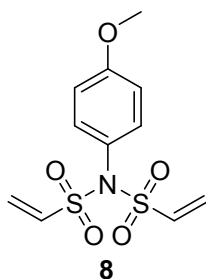

*N*-(4-methoxyphenyl)-*N*-(vinylsulfonyl)ethenesulfonamide (**8**):  $^1\text{H}$  NMR (500 MHz, Chloroform-*d*)  $\delta$  7.21 (d,  $J = 8.7$  Hz, 2H), 7.07 (dd,  $J = 16.5, 9.9$  Hz, 2H), 6.94 (d,  $J = 8.7$  Hz, 2H), 6.31 (d,  $J = 16.5$  Hz, 2H), 6.16 (d,  $J = 9.8$  Hz, 2H), 3.84 (s, 3H);  $^{13}\text{C}$  NMR (126 MHz,  $\text{CDCl}_3$ )  $\delta$  161.03, 136.07, 132.05, 129.56, 125.82, 114.77, 55.54. HRMS (ESI)  $[\text{M}+\text{H}]^+$  Calculated for  $\text{C}_{11}\text{H}_{14}\text{NO}_5\text{S}_2$ , 304.0313, Found 304.0298.

$^1\text{H}$  NMR of compound **8**

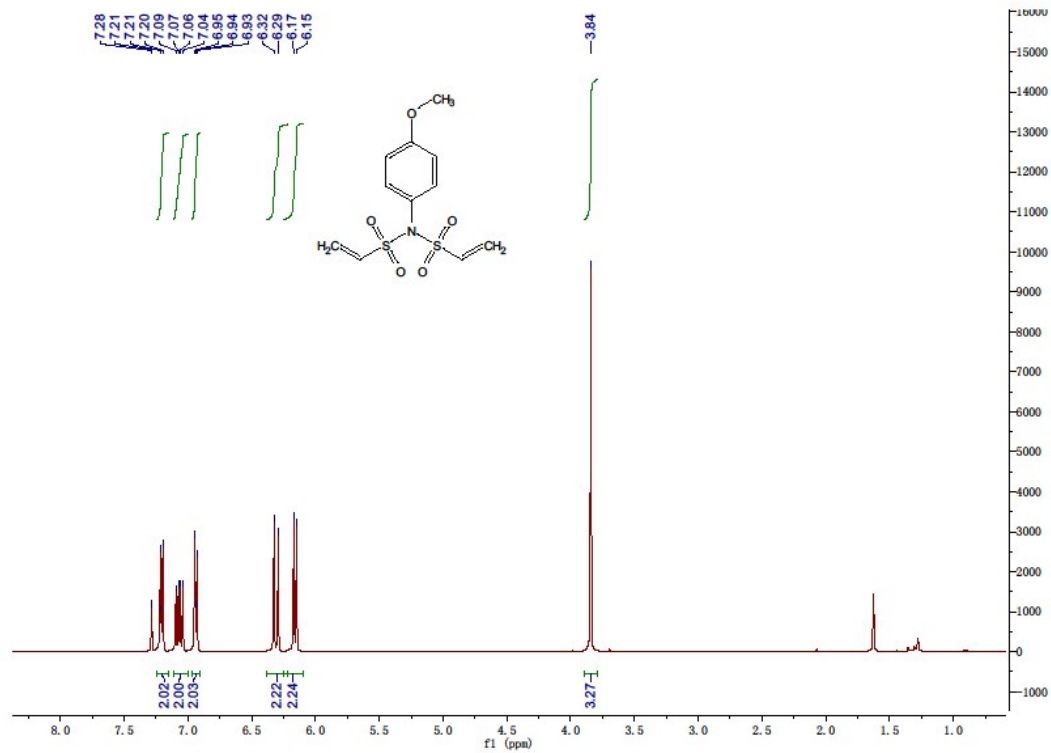

**<sup>13</sup>C NMR of compound 8**

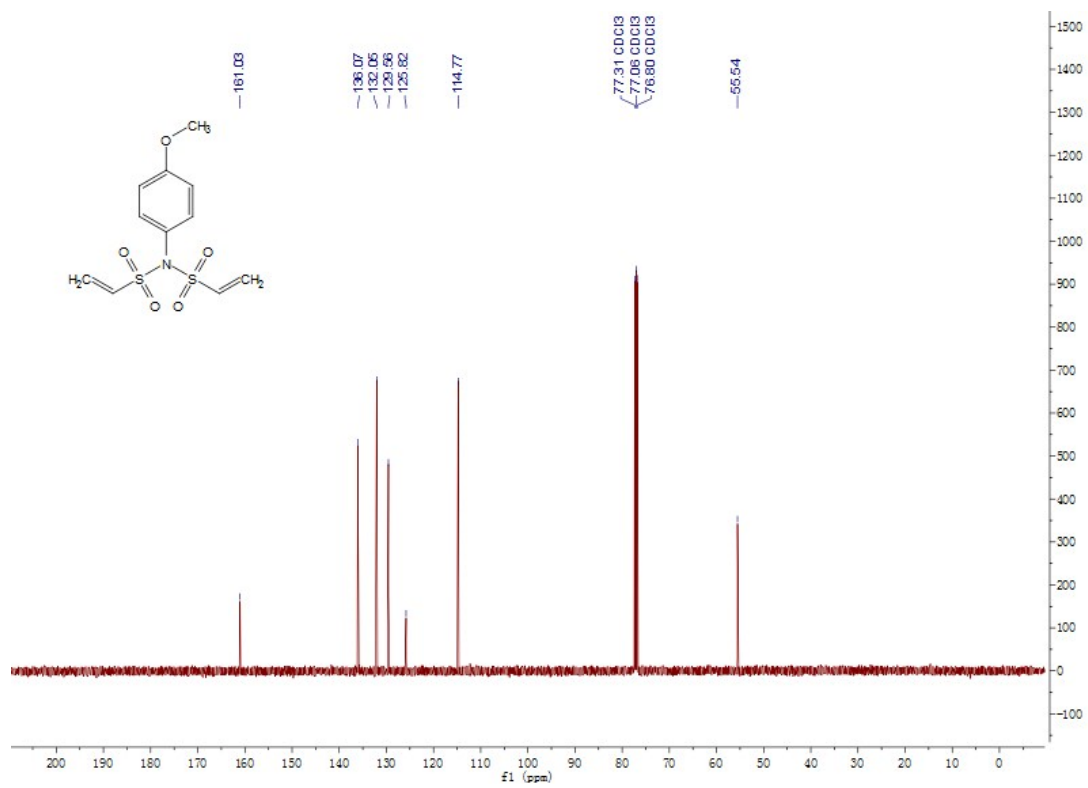

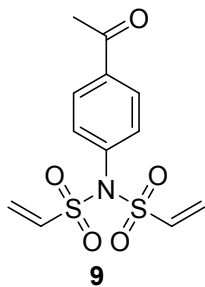

***N*-(4-acetylphenyl)-*N*-(vinylsulfonyl)ethenesulfonamide (9):**  $^1\text{H}$  NMR (500 MHz, Chloroform-*d*)  $\delta$  8.03 (d,  $J = 8.5$  Hz, 2H), 7.40 (d,  $J = 8.5$  Hz, 2H), 7.09 (dd,  $J = 16.5, 9.8$  Hz, 2H), 6.32 (d,  $J = 16.4$  Hz, 2H), 6.20 (d,  $J = 9.9$  Hz, 2H), 2.64 (s, 3H);  $^{13}\text{C}$  NMR (126 MHz,  $\text{CDCl}_3$ )  $\delta$  196.76, 138.32, 137.56, 135.93, 131.16, 130.11, 129.44, 26.76. HRMS (ESI)  $[\text{M}+\text{H}]^+$  Calculated for  $\text{C}_{12}\text{H}_{14}\text{NO}_5\text{S}_2$ , 316.0313, Found 316.0313.

$^1\text{H}$  NMR of compound **9**

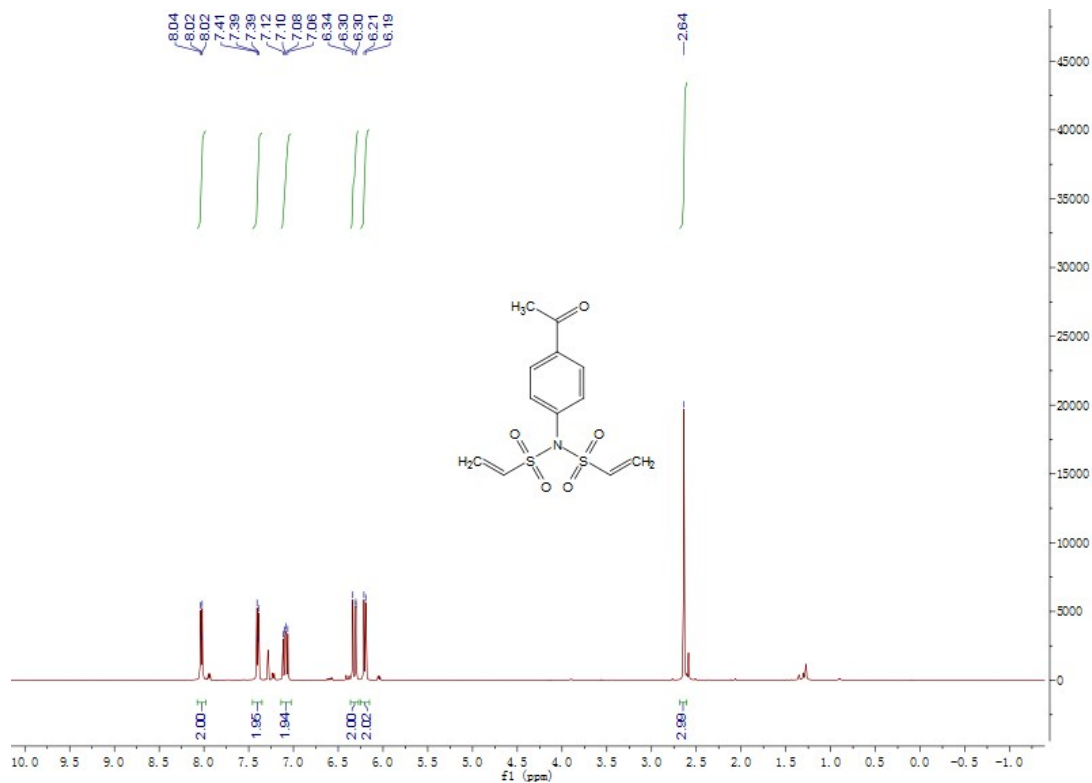

$^{13}\text{C}$  NMR of compound **9**

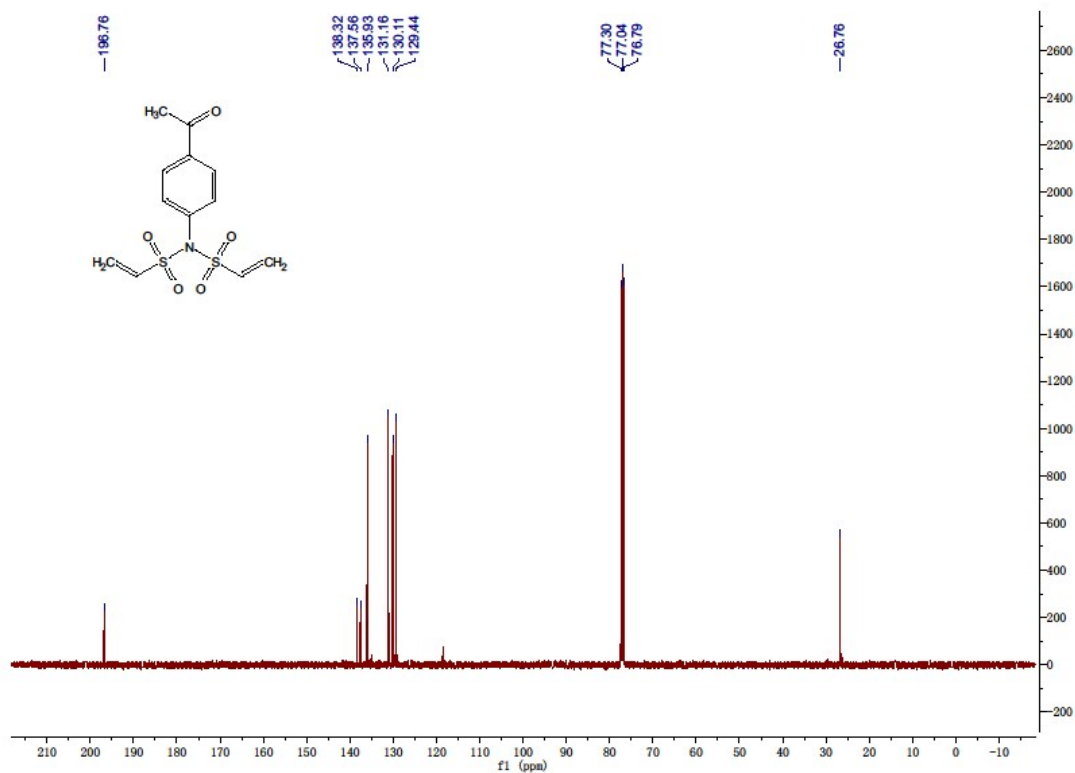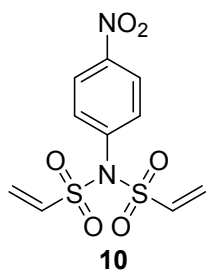

*N*-(4-nitrophenyl)-*N*-(vinylsulfonyl)ethanesulfonamide (**10**):  $^1\text{H}$  NMR (500 MHz, Chloroform-*d*)  $\delta$  8.32 (d,  $J$  = 8.9 Hz, 2H), 7.49 (d,  $J$  = 8.9 Hz, 2H), 7.10 (dd,  $J$  = 16.5, 9.8 Hz, 2H), 6.34 (dd,  $J$  = 16.5, 1.0 Hz, 2H), 6.24 (dd,  $J$  = 9.8, 1.0 Hz, 2H);  $^{13}\text{C}$  NMR (126 MHz,  $\text{CDCl}_3$ )  $\delta$  148.69, 139.08, 135.70, 132.03, 130.63, 124.74. HRMS (ESI)  $[\text{M}+\text{H}]^+$  Calculated for  $\text{C}_{10}\text{H}_{11}\text{N}_2\text{O}_6\text{S}_2$ , 319.0059, Found 318.9974.

$^1\text{H}$  NMR of compound **10**

artical  
1H lzh-20160727-1

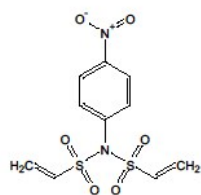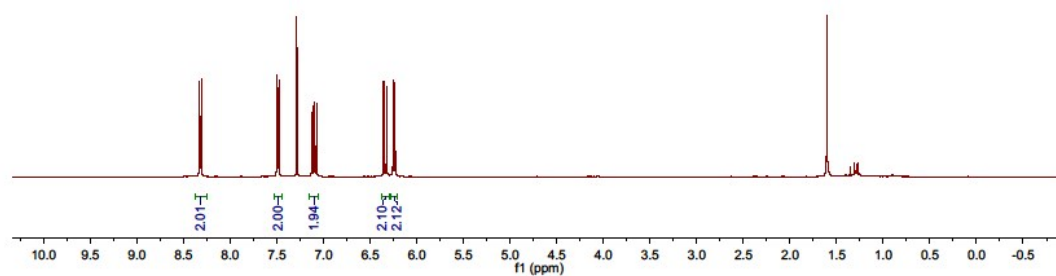

### <sup>13</sup>C NMR of compound 10

artical  
13C lzh-20160727-1

148.69  
139.08  
135.70  
132.03  
130.63  
124.74

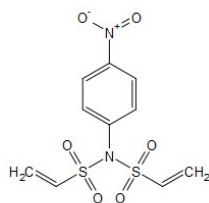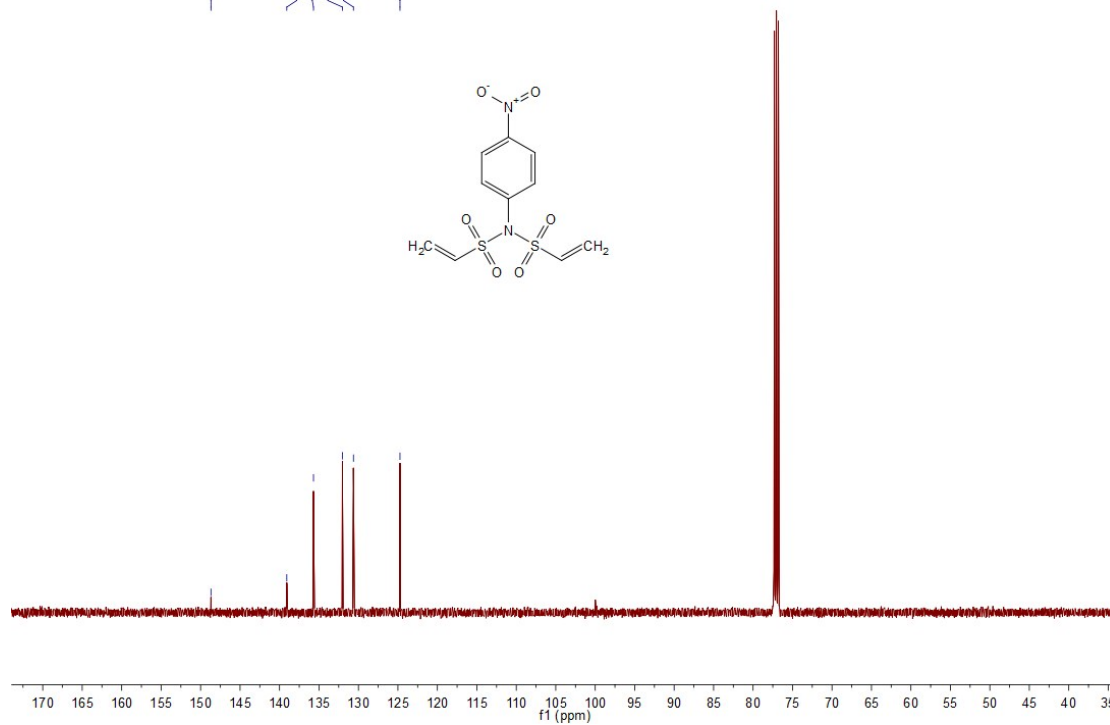

### General procedure for the synthesis of compound 12

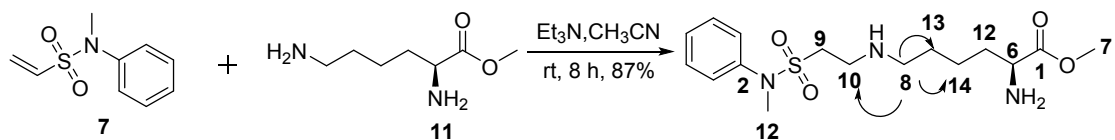

To a solution of compound **7** (100 mg, 0.51 mmol) and L-Lysine methyl ester dihydrochloride (355 mg, 1.52 mmol) in CH<sub>3</sub>CN, Et<sub>3</sub>N (307 mg, 3.05 mmol) was added. The resulting solution was stirred at rt overnight. The solvent was removed under vacuum, the residue was dissolved in DCM, and washed with water and brine. The organic layer was dried over anhydrous Na<sub>2</sub>SO<sub>4</sub> and concentrated under vacuum. The product was purified by column chromatography using CH<sub>3</sub>OH:DCM=1:10 as eluent (158 mg, 87% yield).

**Methyl N<sup>6</sup>-(2-(N-methyl-N-phenylsulfonyl)ethyl)-L-lysinate (12):** <sup>1</sup>H NMR (500 MHz, Chloroform-*d*) δ 7.29 (m, 4H), 7.18 (m, 1H), 3.61 (s, 3H), 3.33 (dd, *J* = 7.6, 5.3 Hz, 1H), 3.24 (s, 3H), 3.10 (t, *J* = 6.5 Hz, 2H), 2.95 (t, *J* = 6.5 Hz, 2H), 2.48 (t, *J* = 7.0 Hz, 2H), 1.82 (s, 3H), 1.61 (m, 1H), 1.45 (m, 1H), 1.38 (m, 2H), 1.34 – 1.23 (m, 2H); <sup>13</sup>C NMR (126 MHz, CDCl<sub>3</sub>) δ 176.37, 141.17, 129.27, 127.29, 126.24, 54.19, 51.90, 49.18, 48.86, 43.37, 38.26, 34.56, 29.41, 23.19. HRMS (ESI) [M+H]<sup>+</sup> Calculated for C<sub>16</sub>H<sub>28</sub>N<sub>3</sub>O<sub>4</sub>S, 358.1801, Found 358.1917.

<sup>1</sup>H NMR of compound **12**

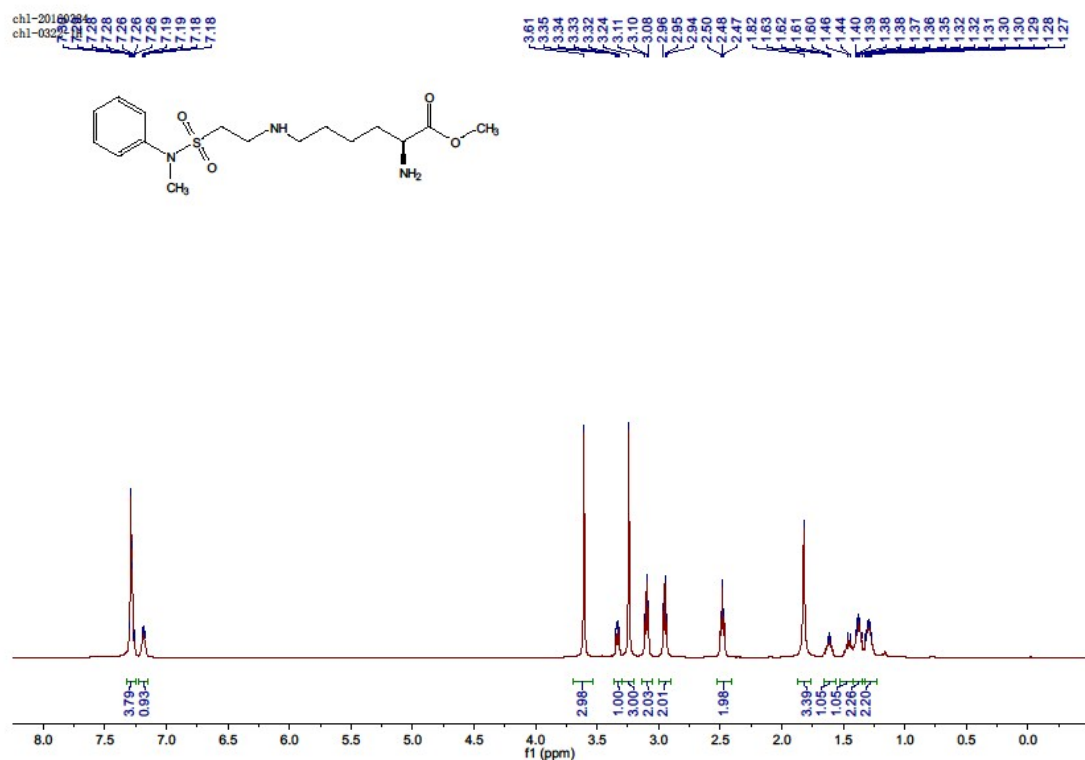

<sup>13</sup>C NMR of compound **12**



dh1-160324  
13C dh1-0322

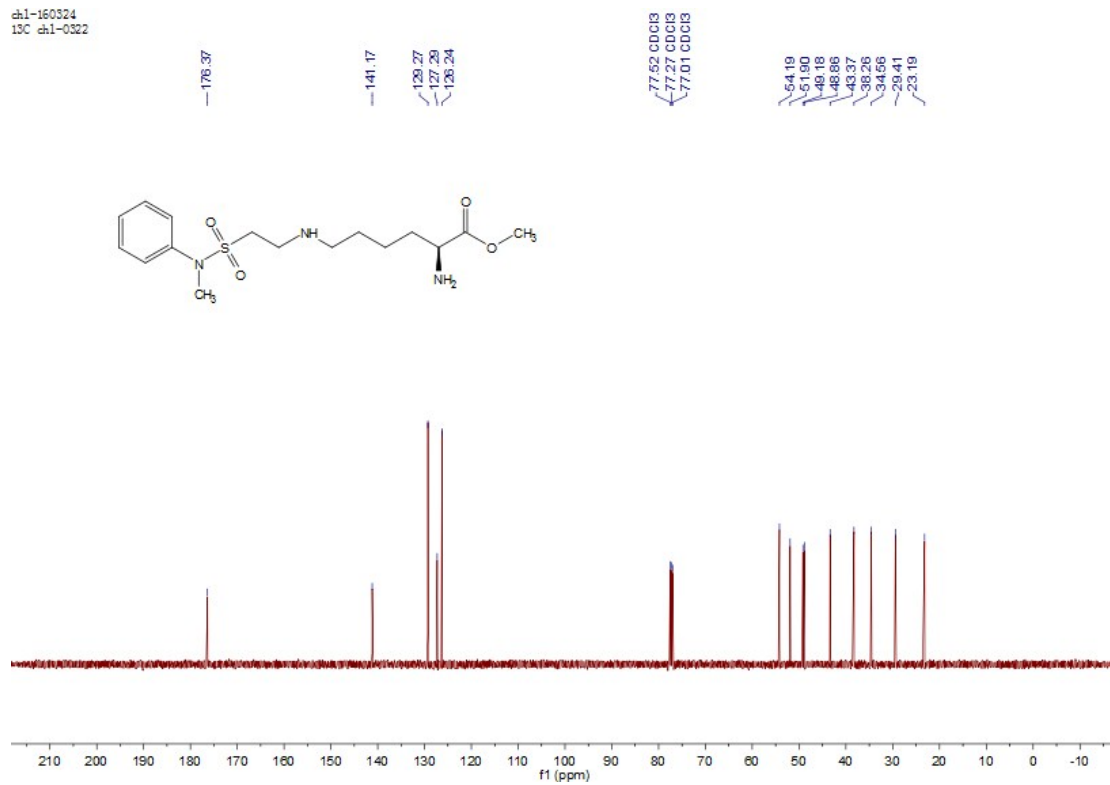

HMBC of compound 12

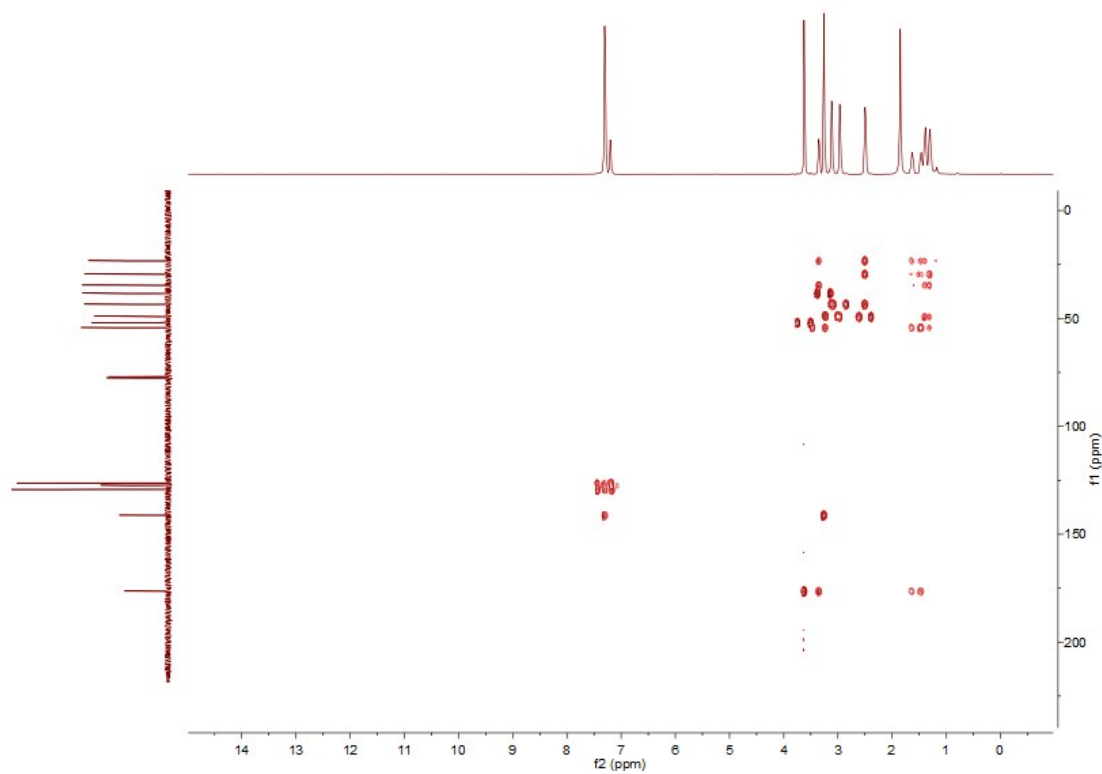

HMBC of compound 12-enlarged view

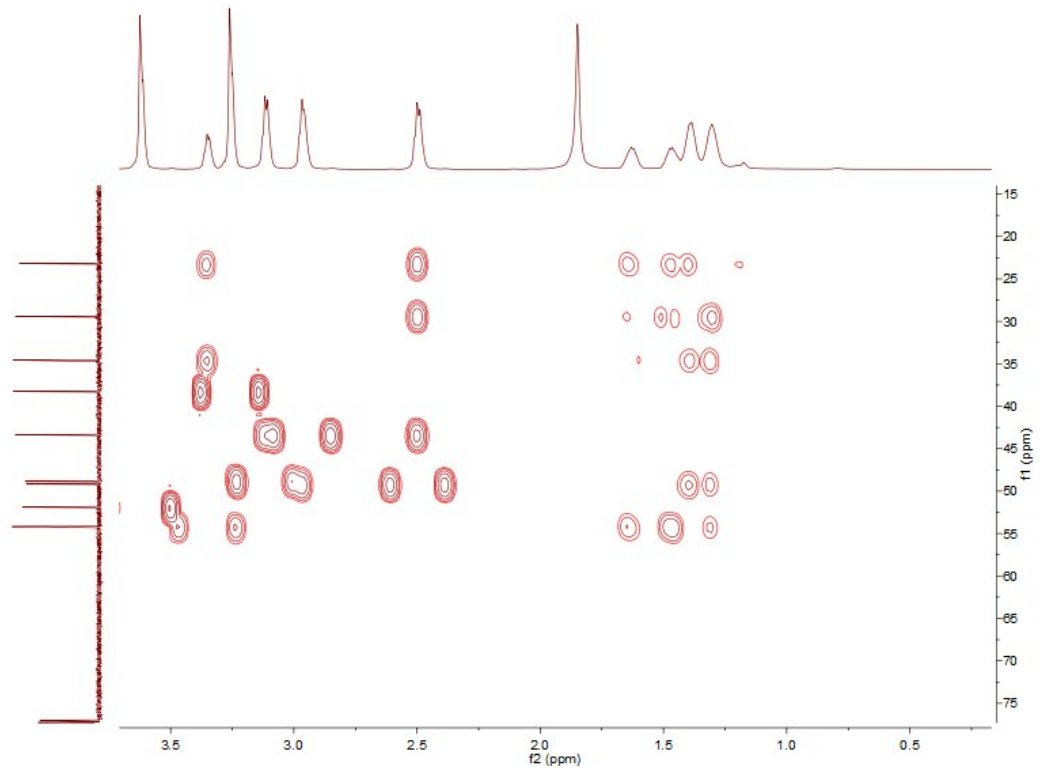

HSQC of compound 12

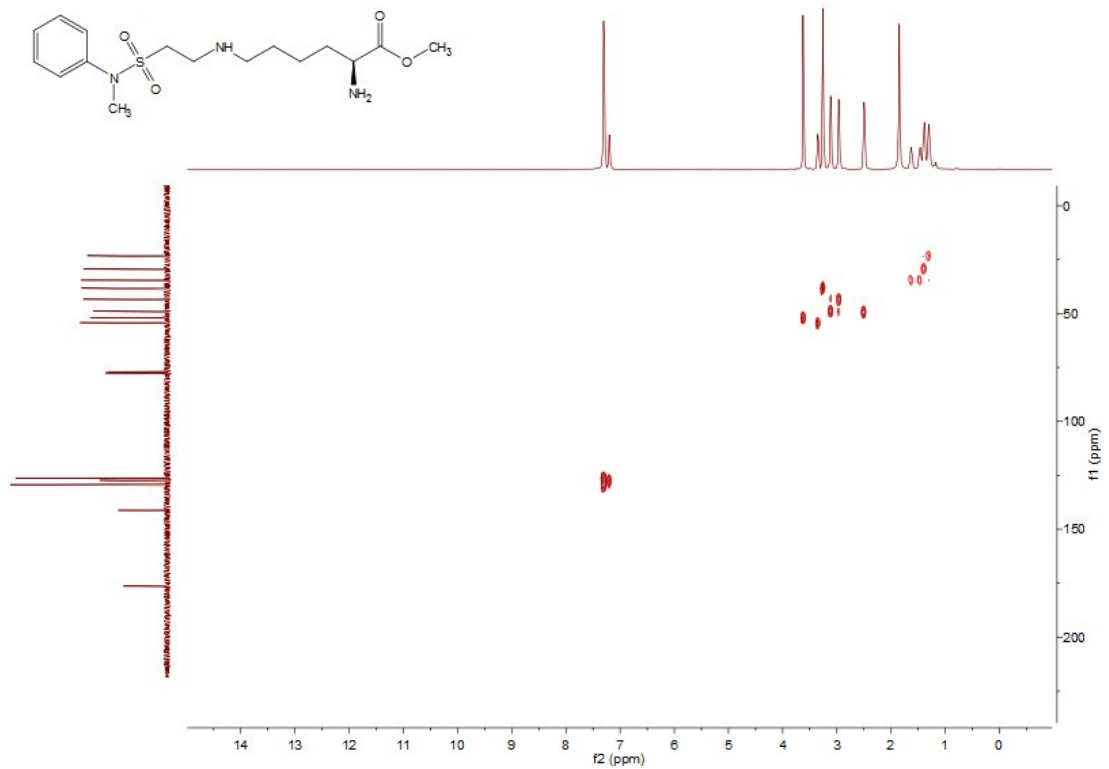

HSQC of compound 12-enlarged view

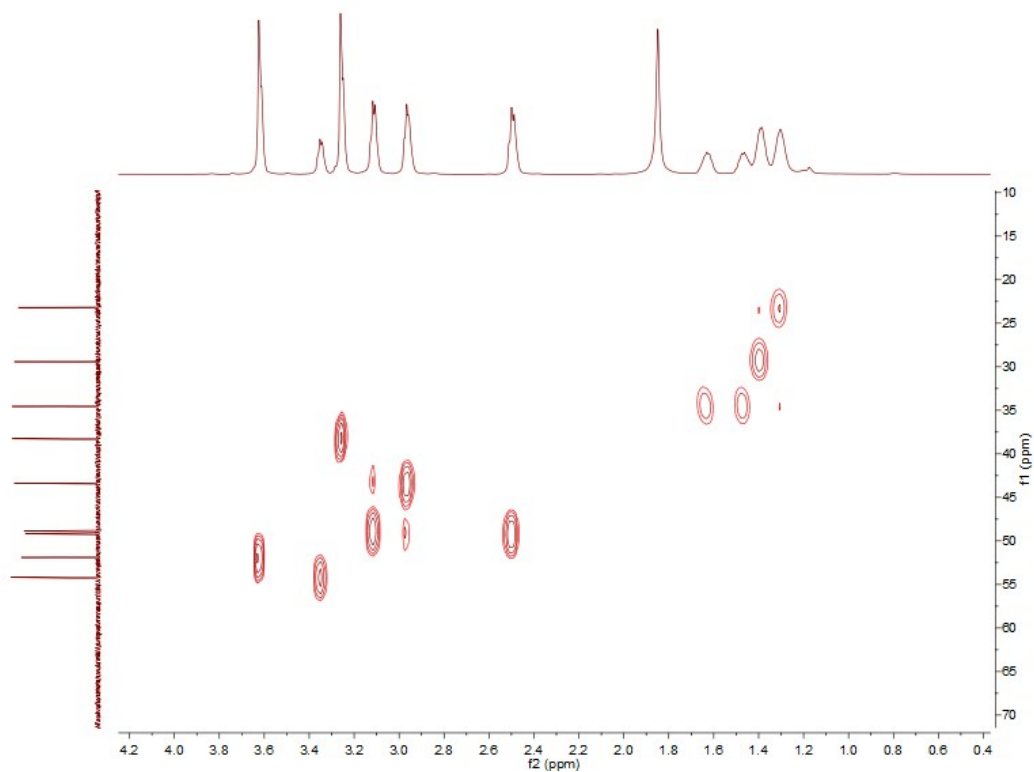

### General procedure for the synthesis of compounds **14** and **15**

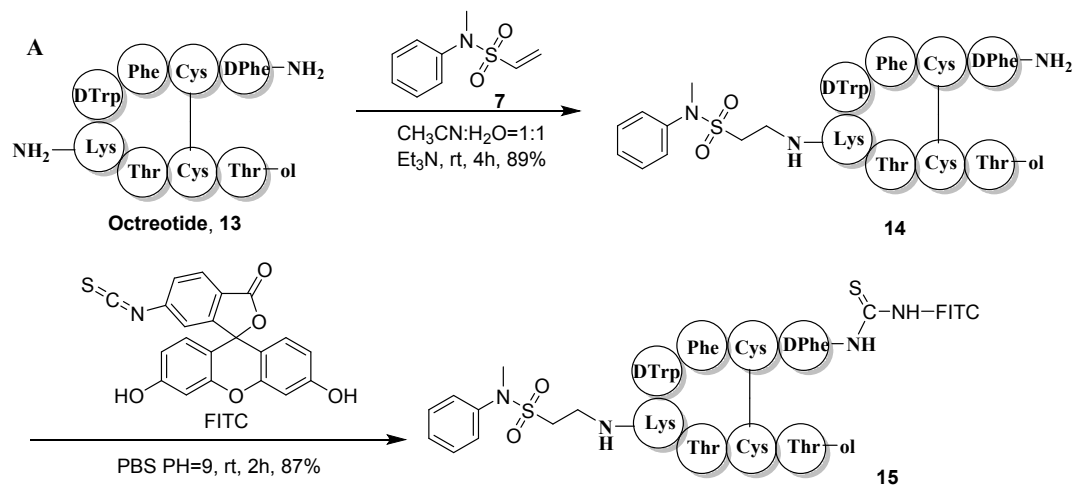

To a solution of octreotide (5 mg, 0.005 mmol) and compound **7** (2.9 mg, 0.015 mmol) in  $\text{CH}_3\text{CN}$  and  $\text{H}_2\text{O}$  (1 ml : 1 ml),  $\text{Et}_3\text{N}$  (3 mg, 0.030 mmol) was added. The resulting solution was stirred at rt. The reaction was analyzed by RP-HPLC and LC-MS. The purified product **14** was obtained using semi-preparative RP-HPLC (89% yield) and determined by HRESIMS,  $\text{MS}^2$  and  $^1\text{H}$  NMR.

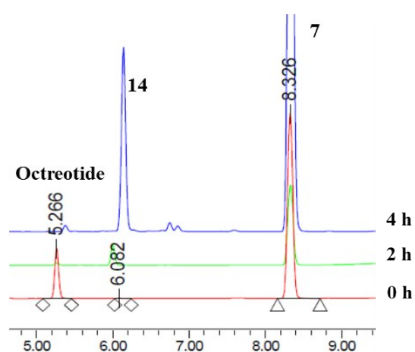

**Fig. 1SA** HPLC of the reaction that compound 7 conjugated with octreotide to produce 14

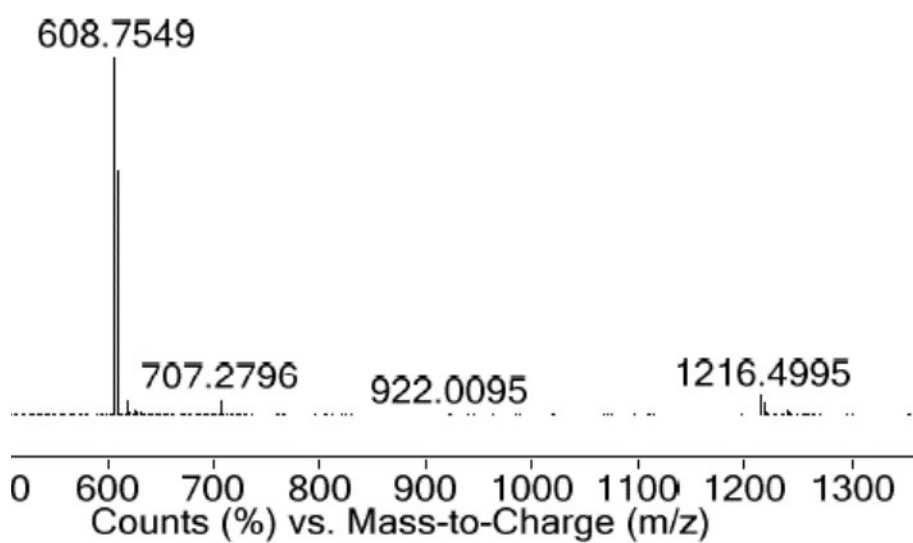

**Fig. 1SB** The HRESIMS of compound 14

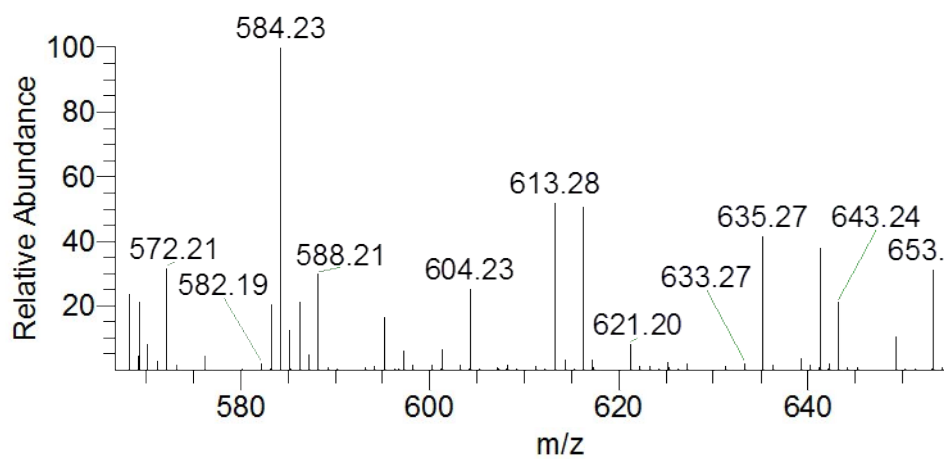

**Fig. 1SC** The MS<sup>2</sup> of compound 14

$m/z$  584.23  $[M+H]^+$

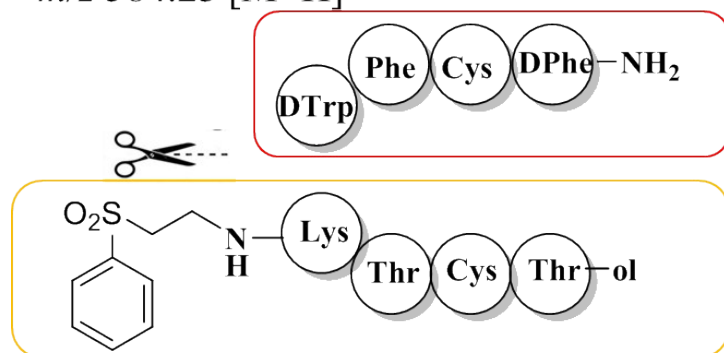

$m/z$  635.27  $[M+H]^+$

**Fig. 1SD** Peptide fragments

<sup>1</sup>H NMR of compound **14**

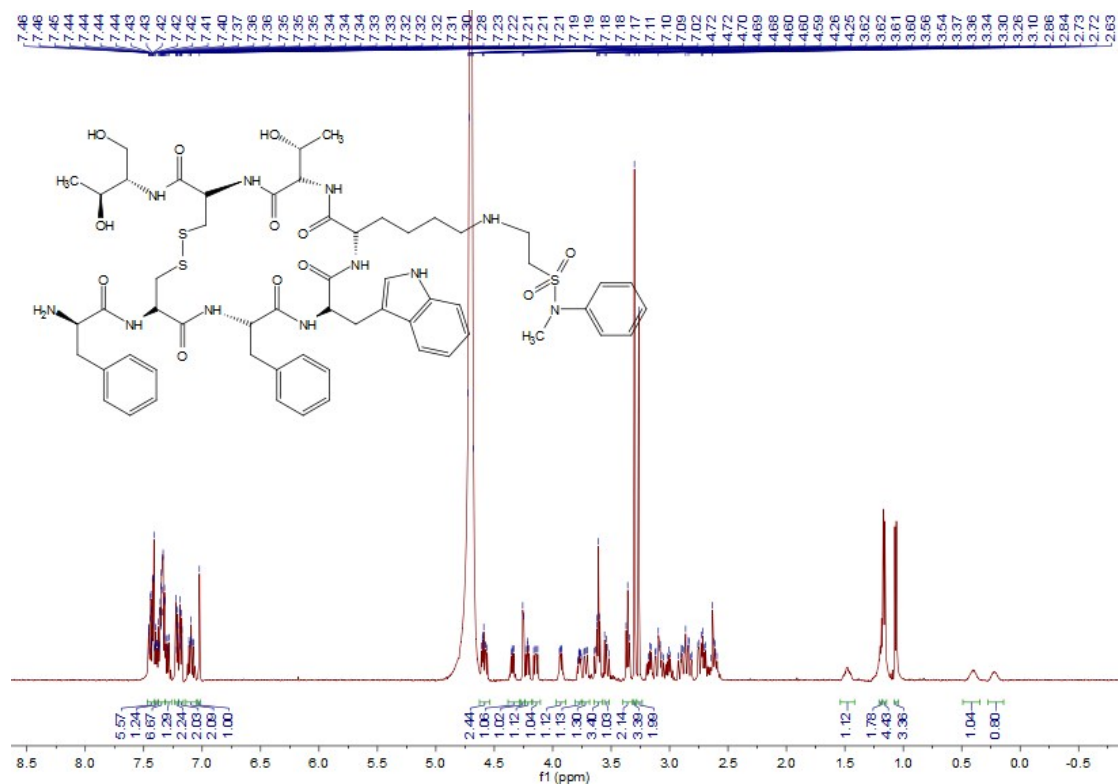

To a solution of compound **14** (2 mg, 0.0016 mmol) in 1.6 ml PBS buffer (50 mmol, PH=9), Fluorescein isothiocyanate (FITC) (0.7 mg, 0.0018 mmol) was added. The resulting solution was stirred at rt for 2 h. The reaction was analyzed by RP-HPLC and LC-MS. The product **15** was determined by HRESIMS and MS<sup>2</sup>.

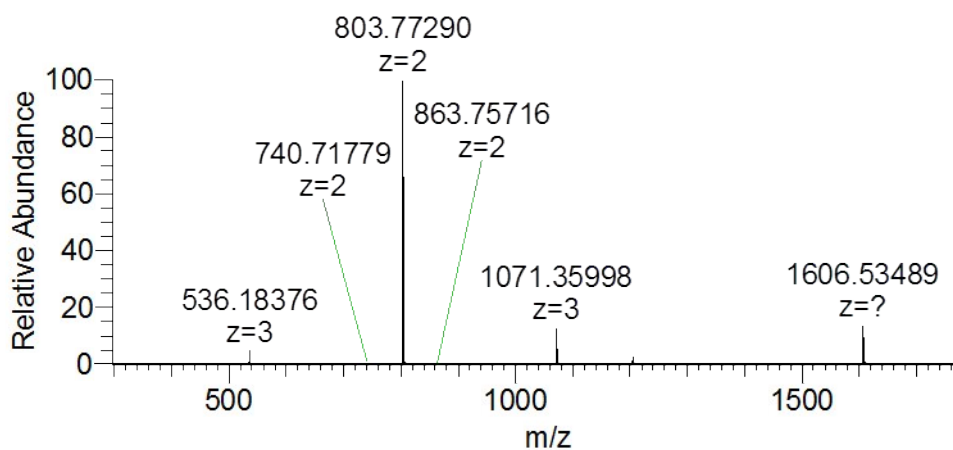

Fig. 1SE HRESIMS of compound **15**

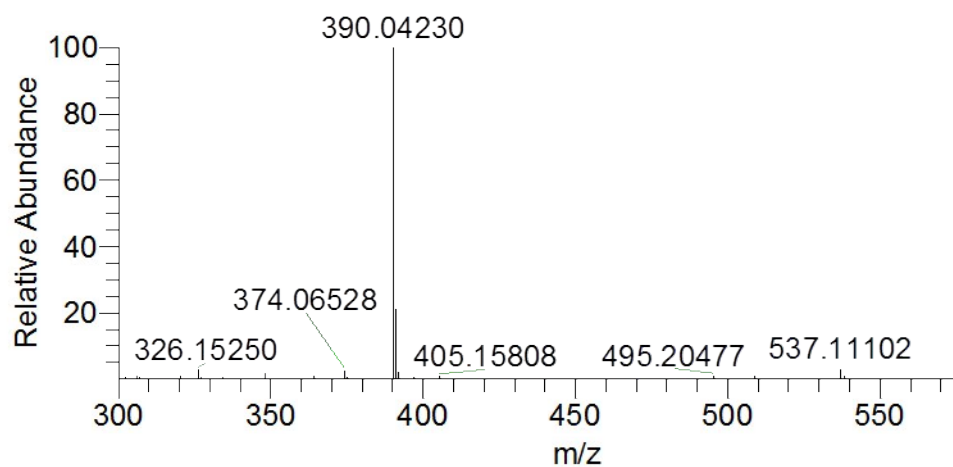

Fig. 1SF MS<sup>2</sup> of compound **15**

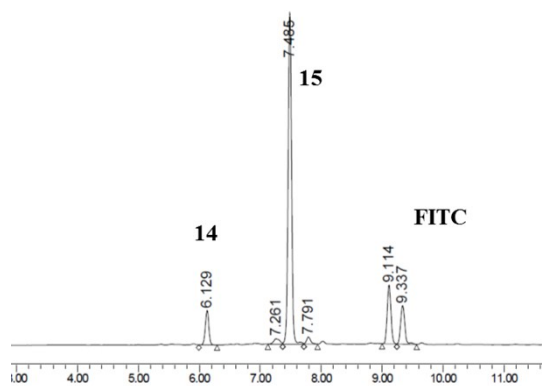

Fig. 1SG HPLC of the reaction that compound **14** reacted with FITC to produce **15**

### General procedure for the synthesis of compound **18**

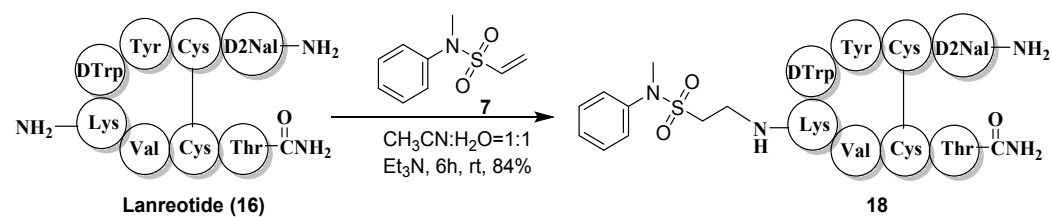

The procedure was same to the synthesis of compound **14** (84% yield).

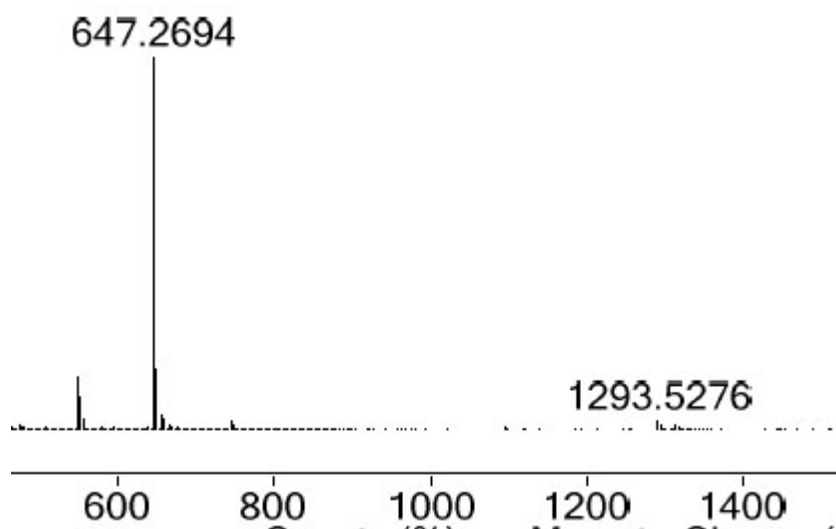

Fig. 2SA The HRESIMS of compound **18**

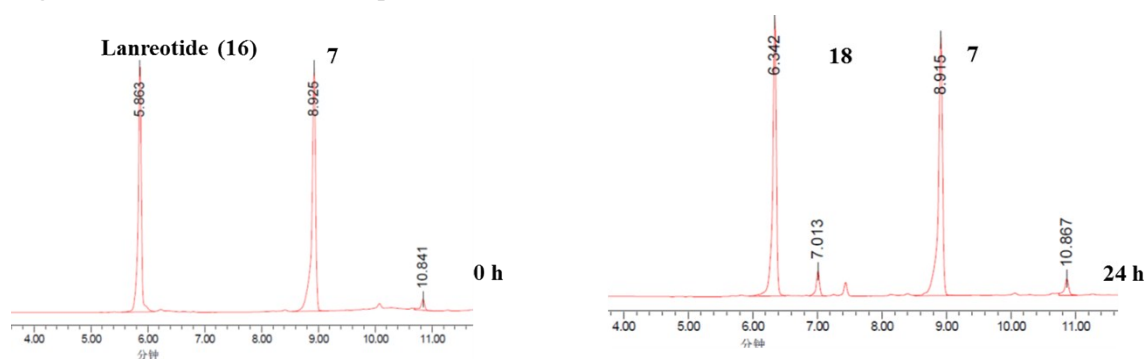

Fig. 2SB HPLC of the reaction that lanreotide **16** reacted with **7** to produce **18**

### General procedure for the synthesis of compound **19**

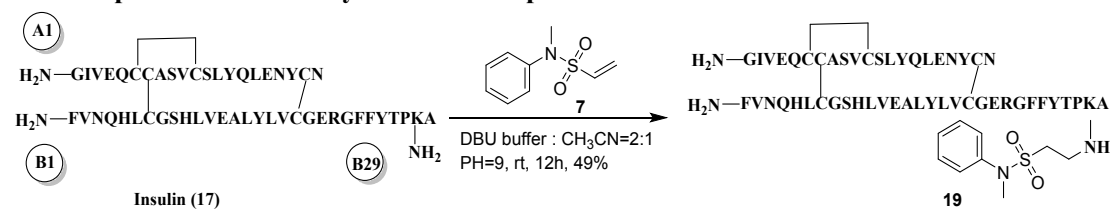

To a solution of insulin (1.57 mg, 0.3  $\mu\text{mol}$ ) in the mixture of DBU buffer (10 mmol, PH=9, 320  $\mu\text{l}$ ) and  $\text{CH}_3\text{CN}$  (160  $\mu\text{l}$ ), compound **7** (1M/L in  $\text{CH}_3\text{CN}$ , 6  $\mu\text{l}$ ) was added. The resulting solution was shaking at rt (49% yield and 90% yield based on recovered insulin).

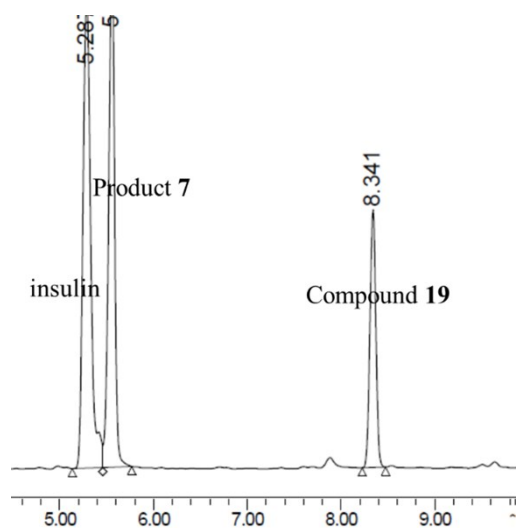

**Fig. 3SA** HPLC of the reaction that compound 7 conjugated with insulin to produce 19

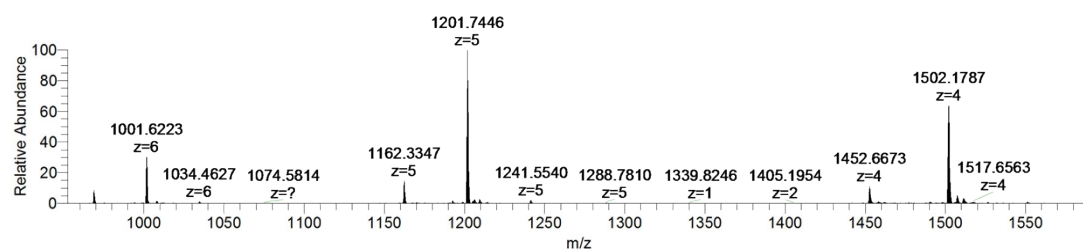

**Fig. 3SB** The HRESIMS of compound 19

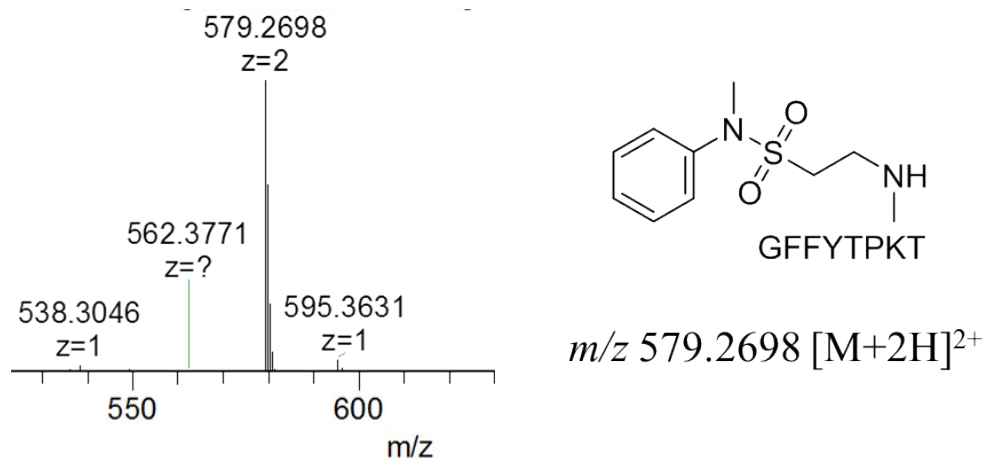

**Fig. 3SC** The MS<sup>2</sup> of compound 19

**General procedure for the synthesis of compound 20**

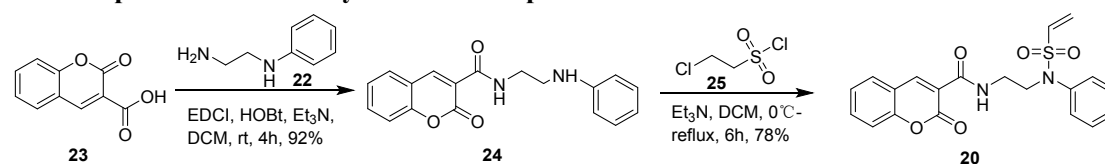

To a solution of compound coumarin-3-carboxylic acid (300 mg, 1.58 mmol), Hydroxybenzotriazole (HOBT, 426 mg, 3.16 mmol) and 3-(ethyliminomethyleneamino)-N,N-



dimethyl-propan-1-amine (EDCI, 600 mg, 3.16 mmol) in DCM under Ar<sub>2</sub> and darkness, Et<sub>3</sub>N (335 mg, 3.31 mmol) was added. The resulting solution was stirred at rt for 10 min. Then N-(2-aminoethyl)benzeneamine (**22**, 236 mg, 1.74 mmol) was added to the reaction mixture. The solution was stirred at rt for another 4h. The reaction was quenched with H<sub>2</sub>O (50 mL) and extracted with DCM (3 × 50 mL). The organic layer was combined, washed with H<sub>2</sub>O (1 × 50 mL) and brine (1 × 50 mL), and dried over anhydrous Na<sub>2</sub>SO<sub>4</sub>. The solvent was removed under vacuum and the residue was purified by column chromatography (EA:PE=1:2) to give the target compound **24** (447 mg, 92% yield).

<sup>1</sup>H NMR (500 MHz, Chloroform-*d*) δ 9.12 (s, 1H), 8.99 – 8.89 (m, 1H), 7.79 – 7.60 (m, 2H), 7.50 – 7.32 (m, 2H), 7.27 – 7.15 (m, 2H), 6.85 – 6.70 (m, 3H), 3.78 (t, *J* = 6.0 Hz, 2H), 3.47 (t, *J* = 6.0 Hz, 2H); <sup>13</sup>C NMR (126 MHz, CDCl<sub>3</sub>) δ 162.63, 161.41, 154.49, 148.62, 134.25, 129.90, 129.43, 125.39, 118.59, 118.20, 116.70, 39.24. HRMS (ESI) [M+H]<sup>+</sup> Calculated for C<sub>18</sub>H<sub>17</sub>N<sub>2</sub>O<sub>3</sub>, 309.1239, Found 309.1241, 331.1042 [M+Na]<sup>+</sup>.

<sup>1</sup>H NMR of compound **24**

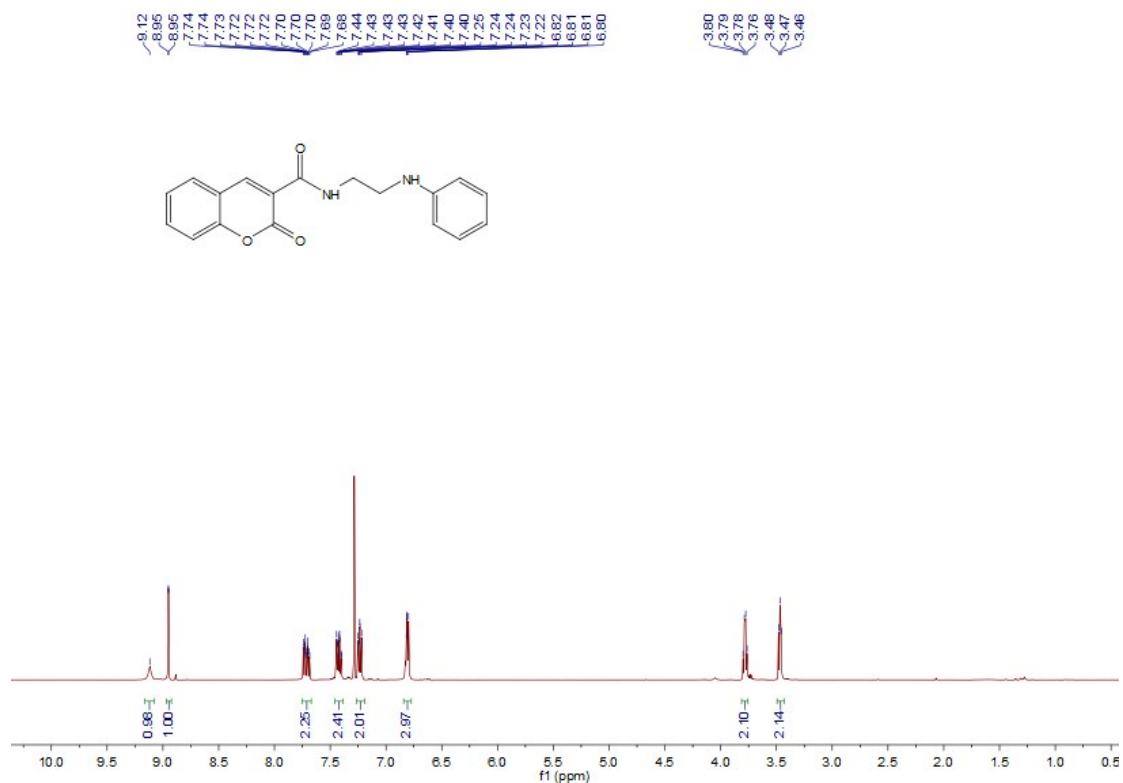

<sup>13</sup>C NMR of compound **24**

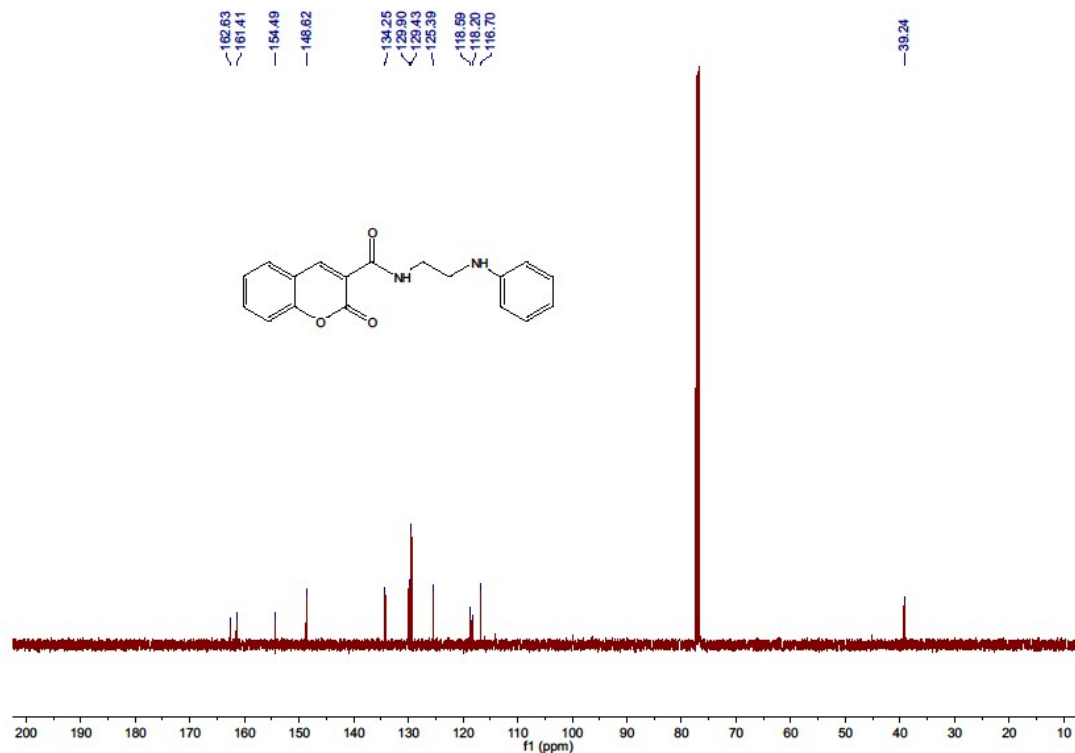

To a stirred solution of compound **24** (233 mg, 0.76 mmol) and trimethylamine (230 mg, 2.28 mmol) in DCM at 0°C, 2-chloroethanesulfonyl chloride (310 mg, 1.9 mmol) was added slowly. The resulting mixture was stirred under reflux until compound **24** was consumed. The reaction was quenched with water and the mixture was extracted with DCM. The combined organic extracts were washed with brine and dried over anhydrous Na<sub>2</sub>SO<sub>4</sub>. The solvent was removed under vacuum and the residue was purified by column chromatography (EA:PE=1:2) to give the desired product **20** (234 mg, 78% yield).

<sup>1</sup>H NMR (500 MHz, Chloroform-*d*) δ 9.00 (t, *J* = 6.1 Hz, 1H), 8.84 (s, 1H), 7.67 (ddd, *J* = 7.5, 6.3, 1.8 Hz, 2H), 7.42 – 7.33 (m, 5H), 7.30 (ddd, *J* = 6.4, 5.2, 2.7 Hz, 1H), 6.56 (dd, *J* = 16.5, 9.9 Hz, 1H), 6.18 (d, *J* = 16.6 Hz, 1H), 5.96 (d, *J* = 9.9 Hz, 1H), 3.85 (t, *J* = 6.1 Hz, 2H), 3.59 (q, *J* = 6.0 Hz, 2H); <sup>13</sup>C NMR (126 MHz, CDCl<sub>3</sub>) δ 161.85, 161.28, 154.48, 148.37, 138.90, 134.17, 133.76, 129.83, 129.54, 128.88, 128.36, 127.96, 125.32, 118.57, 118.17, 116.70, 49.76, 38.83. HRMS (ESI) [M+H]<sup>+</sup> Calculated for C<sub>20</sub>H<sub>19</sub>N<sub>2</sub>O<sub>5</sub>S, 399.1015, Found 399.1038.



### General procedure for the synthesis of compound 21

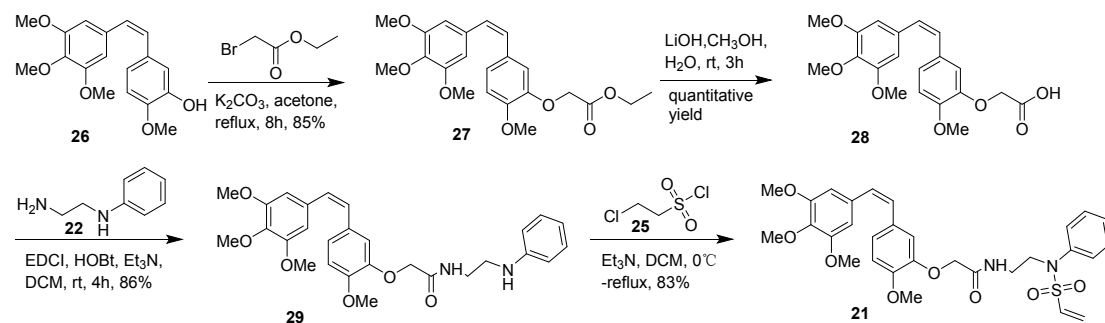

To a solution of combretastatin A-4 (CA4, 152 mg, 0.48 mmol) and  $K_2CO_3$  (199 mg, 1.44 mmol) in acetone,  $\alpha$ -bromoethyl acetate (120 mg, 0.72 mmol) was added. The mixture was stirred under reflux. The reaction was monitored by TLC. After the reaction was completed, the solid was filtered and washed with DCM. The filtrate was concentrated under reduced pressure. The residue was purified column chromatography (EA:PE=1:3) to give the desired product (165 mg, 85% yield).

$^1H$  NMR (500 MHz, Chloroform-*d*)  $\delta$  6.91 (dd,  $J = 8.3, 2.0$  Hz, 1H), 6.79 (d,  $J = 8.3$  Hz, 1H), 6.75 (d,  $J = 1.9$  Hz, 1H), 6.48 (s, 2H), 6.45 (d,  $J = 6.4$  Hz, 2H), 4.50 (s, 2H), 4.18 (q,  $J = 7.1$  Hz, 2H), 3.86 (s, 3H), 3.84 (s, 3H), 3.69 (s, 6H), 1.24 (t,  $J = 7.1$  Hz, 3H).

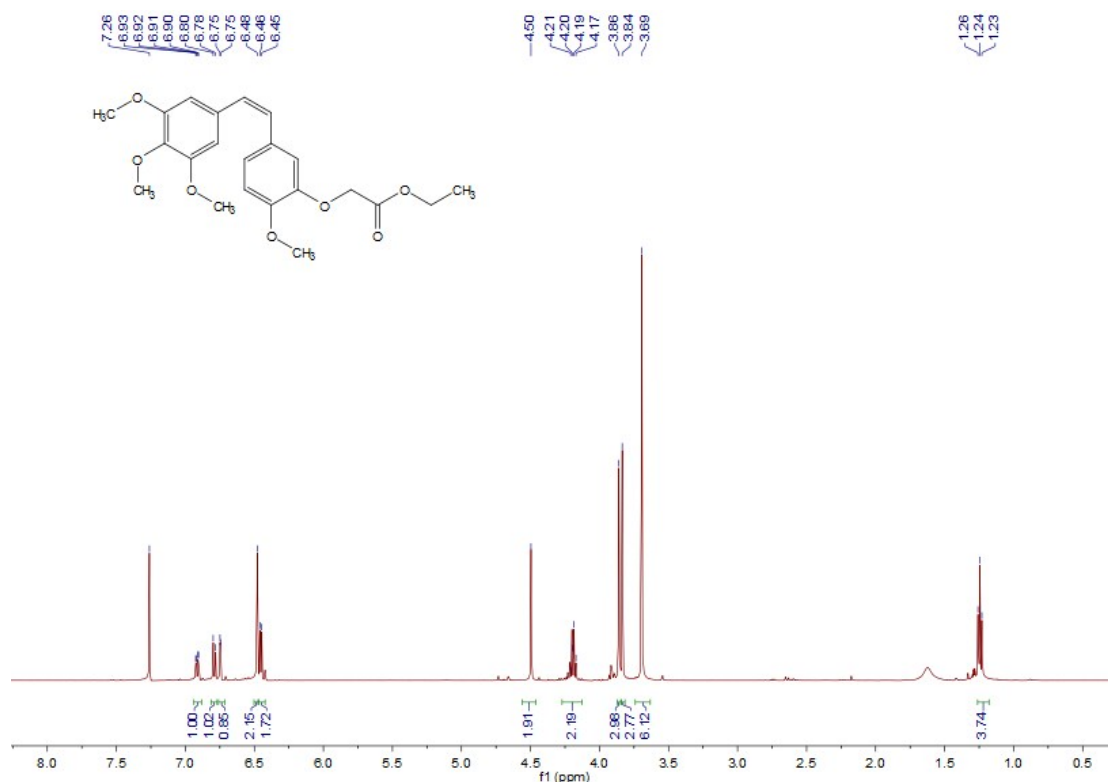

To a solution of the ester obtained above **27** (165 mg, 0.41 mmol) in  $CH_3OH$  and  $H_2O$  (10:1),  $LiOH \cdot H_2O$  (21 mg, 0.49 mmol) was added. The resulting solution was stirred at rt for 3 h. The PH of the reaction solution was adjusted to 4 with diluted HCl. The mixture was diluted with water and extracted with DCM. The organic phase was dried over anhydrous  $Na_2SO_4$  and concentrated under reduced pressure to give the desired product **28** (quantitative yield), which was used directly in the next step.

To a solution of compound **28** (122 mg, 0.33 mmol), Hydroxybenzotriazole (HOBt, 88 mg, 0.65 mmol) and 3-(ethyliminomethyleneamino)-*N,N*-dimethyl-propan-1-amine (EDCI, 125 mg, 0.65

mmol) in DCM,, Et<sub>3</sub>N (71mg, 0.7 mmol) was added. The resulting solution was stirred at rt for 10 min. Then N-(2-aminoethyl)benzeneamine (**22**, 49 mg, 0.36 mmol) was added to the reaction mixture. The solution was stirred at rt for another 4h. The reaction was quenched with H<sub>2</sub>O (50 mL) and extracted with DCM (3 × 50 mL). The organic layer was combined, washed with H<sub>2</sub>O (1 × 50 mL) and brine (1 × 50 mL), and dried over anhydrous Na<sub>2</sub>SO<sub>4</sub>. The solvent was removed under vacuum and the residue was purified by column chromatography (EA:PE=1:1) to give the target compound **29** (138 mg, 86% yield).

<sup>1</sup>H NMR (500 MHz, Chloroform-*d*) δ 7.25 (t, *J* = 6.3 Hz, 1H), 7.18 – 7.12 (m, 2H), 6.96 (dd, *J* = 8.4, 2.0 Hz, 1H), 6.82 (d, *J* = 2.0 Hz, 1H), 6.76 (d, *J* = 8.4 Hz, 1H), 6.73 – 6.65 (m, 1H), 6.62 – 6.56 (m, 2H), 6.47 (s, 2H), 6.45 (d, *J* = 5.3 Hz, 2H), 4.38 (s, 2H), 3.84 (s, 3H), 3.77 (s, 3H), 3.68 (s, 6H), 3.55 (d, *J* = 6.0 Hz, 2H), 3.29 (t, *J* = 5.9 Hz, 2H); <sup>13</sup>C NMR (126 MHz, CDCl<sub>3</sub>) δ 169.19, 153.03, 148.81, 147.85, 146.70, 137.28, 132.65, 130.40, 129.63, 129.32, 128.95, 123.98, 117.64, 116.48, 112.80, 111.67, 105.98, 69.53, 60.98, 55.98, 55.88, 43.82, 38.53. HRMS (ESI) [M+H]<sup>+</sup> Calculated for C<sub>28</sub>H<sub>32</sub>N<sub>2</sub>O<sub>6</sub>, 493.2339, Found 493.2418, 515.2171 [M+Na]<sup>+</sup>.

### <sup>1</sup>H NMR of compound **29**

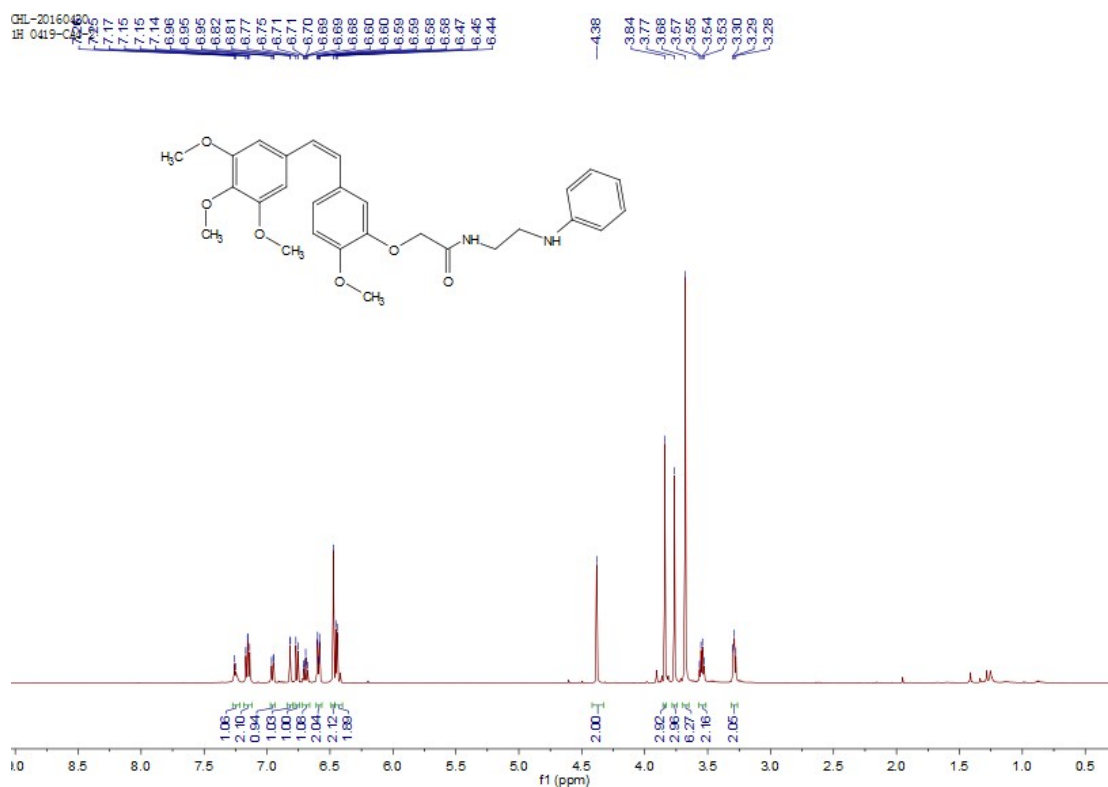

### <sup>13</sup>C NMR of compound **29**

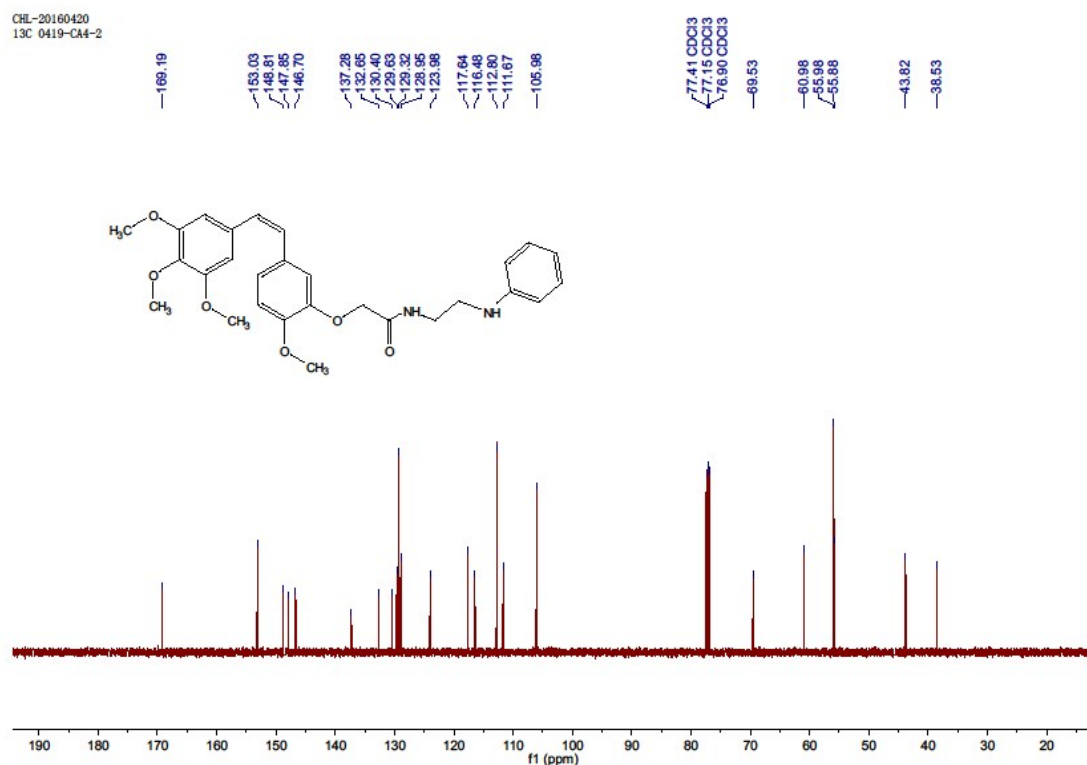

To a stirred solution of compound **22** (90 mg, 0.18 mmol) and trimethylamine (55 mg, 0.55 mmol) in DCM at 0°C, 2-chloroethanesulfonyl chloride (59 mg, 0.36 mmol) was added slowly. The resulting mixture was stirred under reflux overnight. The reaction was quenched with water and the mixture was extracted with DCM. The combined organic extracts were washed with brine and dried over anhydrous Na<sub>2</sub>SO<sub>4</sub>. The solvent was removed under vacuum and the residue was purified by column chromatography (EA:PE=1:1) to give the desired product **17** (88 mg, 83% yield).

<sup>1</sup>H NMR (500 MHz, Chloroform-*d*) δ 7.36 – 7.23 (m, 6H), 6.98 (dd, *J* = 8.4, 2.0 Hz, 1H), 6.85 – 6.77 (m, 2H), 6.53 (dd, *J* = 16.5, 9.9 Hz, 1H), 6.48 (d, *J* = 13.8 Hz, 3H), 6.15 (d, *J* = 16.6 Hz, 1H), 5.96 (d, *J* = 9.9 Hz, 1H), 4.29 (s, 2H), 3.91 (s, 3H), 3.84 (s, 3H), 3.75 (dd, *J* = 6.5, 5.3 Hz, 2H), 3.69 (s, 6H), 3.43 (q, *J* = 5.9 Hz, 2H); <sup>13</sup>C NMR (126 MHz, CDCl<sub>3</sub>) δ 168.71, 152.99, 148.89, 146.62, 138.94, 137.25, 133.42, 132.66, 130.16, 129.50, 129.44, 129.06, 128.78, 128.41, 128.12, 123.74, 115.83, 111.62, 105.96, 68.87, 60.95, 55.97, 55.94, 49.99, 37.98. HRMS (ESI) [M+H]<sup>+</sup> Calculated for C<sub>30</sub>H<sub>35</sub>N<sub>2</sub>O<sub>8</sub>S, 583.2114, Found 583.2025, 605.1844 [M+Na]<sup>+</sup>

<sup>1</sup>H NMR of compound **21**

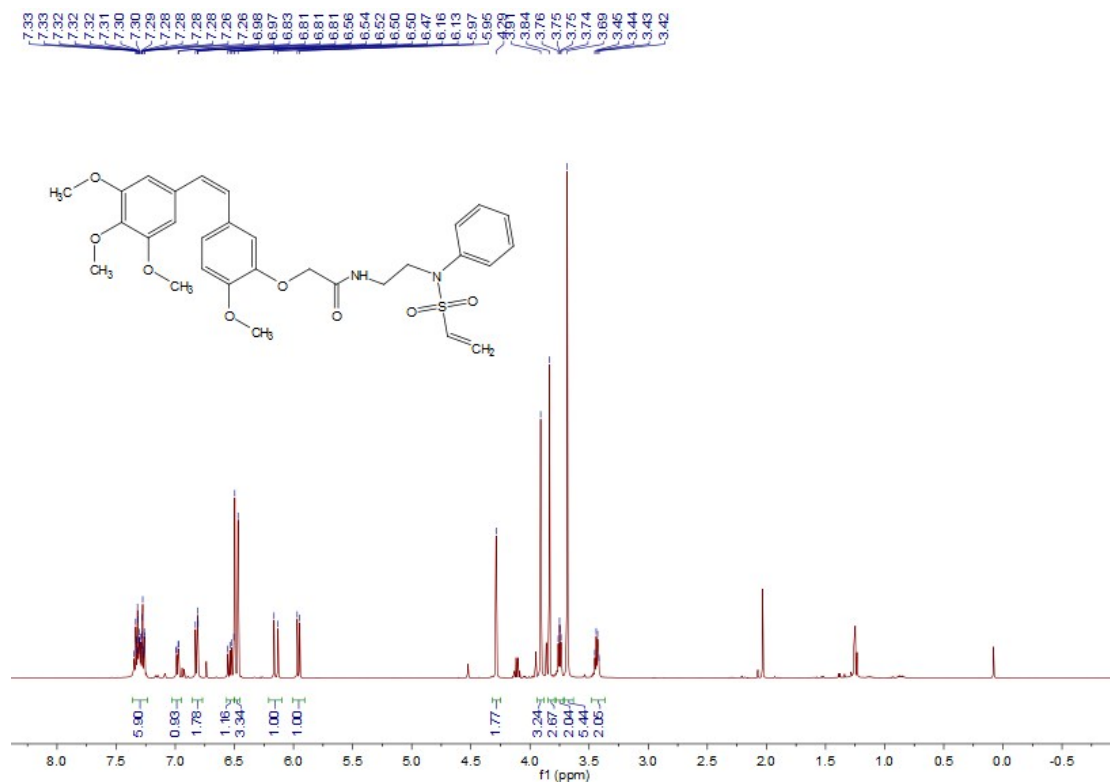

**<sup>13</sup>C NMR of compound 21**

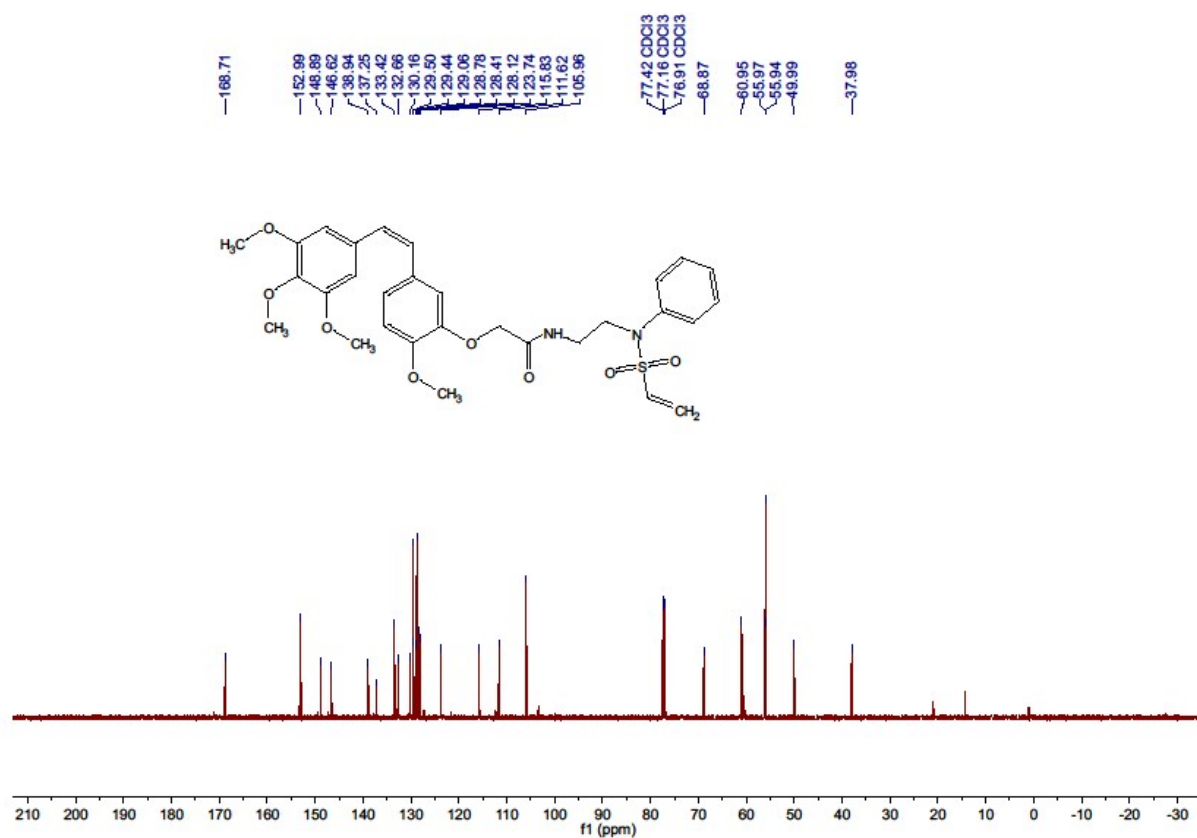

**General procedure for the synthesis of compounds 30 and 31**

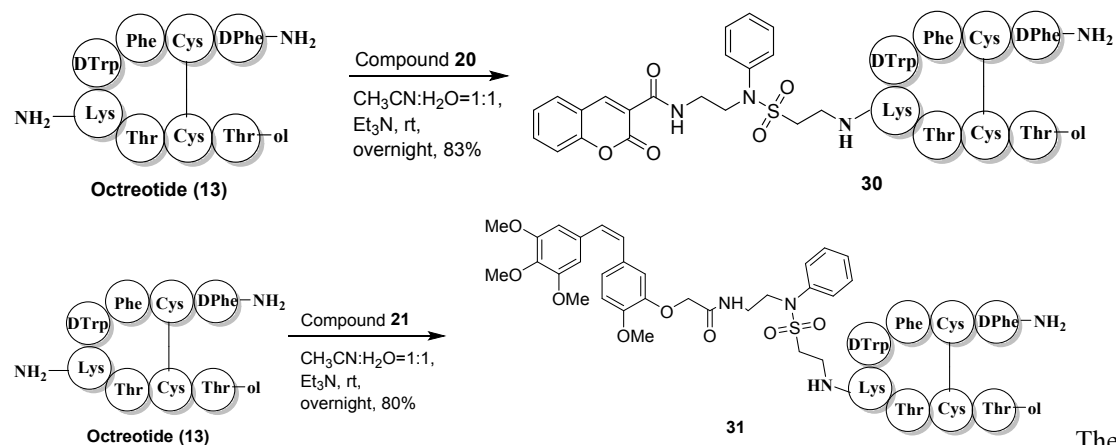

The procedure was same to the synthesis of compound **14**. The yields of compound **30** and **31** were determined by HPLC (For compound **30**: 83% yield, 94% yield based on recovered octreotide; For compound **31**: 80% yield, 95% yield based on recovered octreotide).

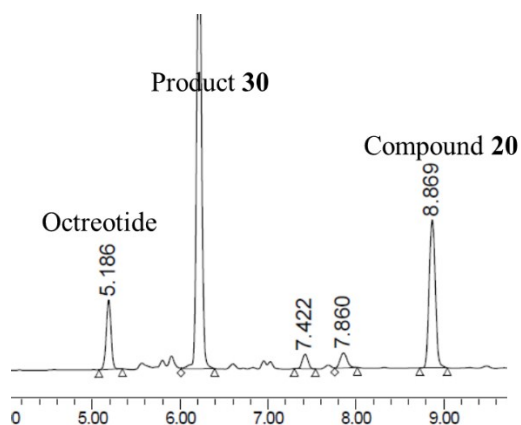

**Fig. 4SA** HPLC of the reaction that compound **20** conjugated with octreotide to produce **30**

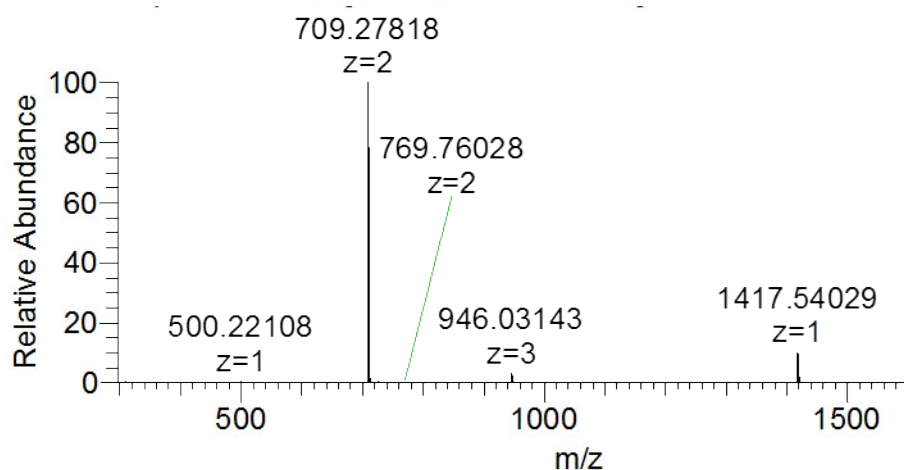

**Fig. 4SB** The HRMS of compound **30**



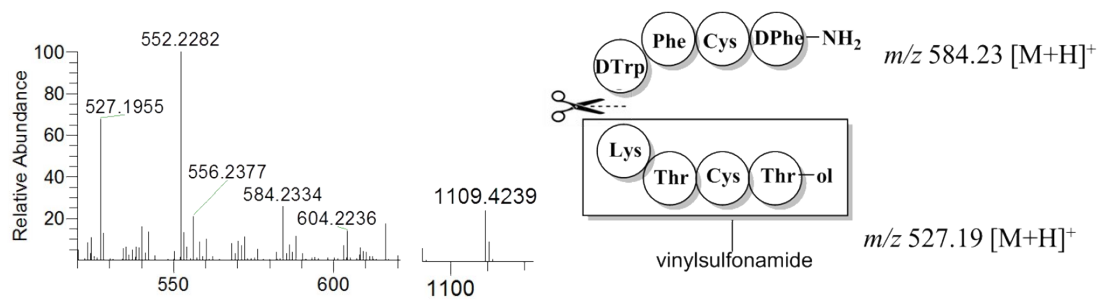

**Fig. 4SC** The MS<sup>2</sup> of compound **30**

<sup>1</sup>H NMR of compound **30**

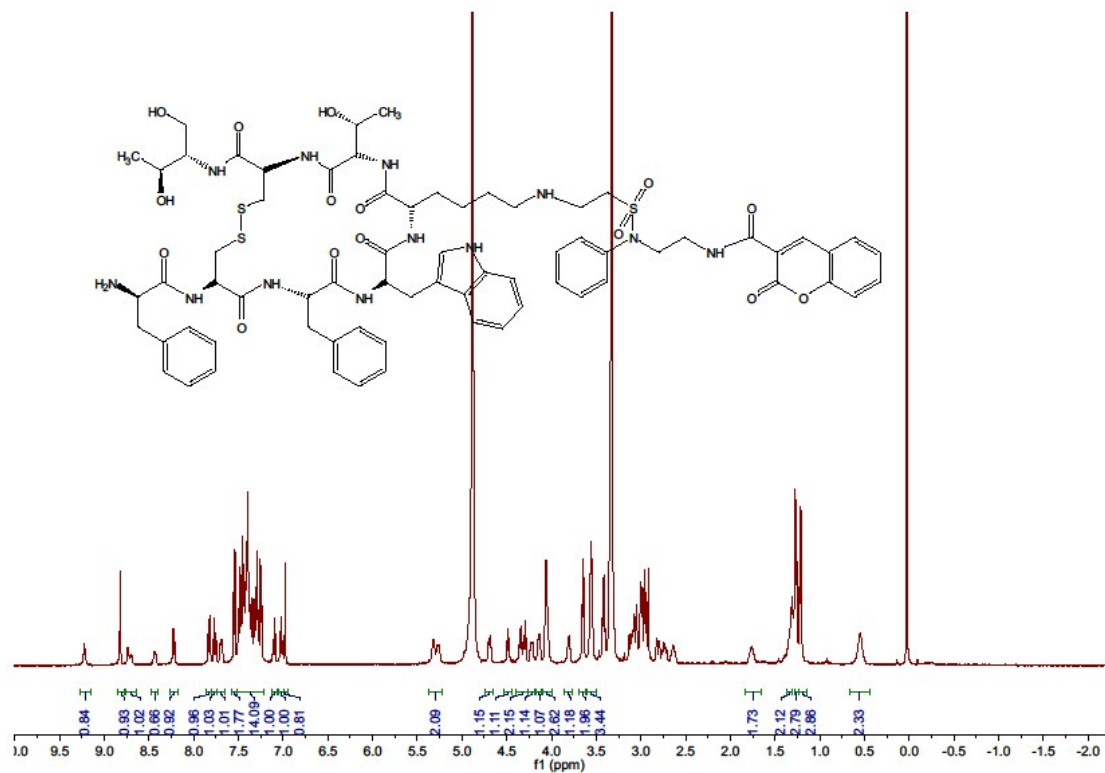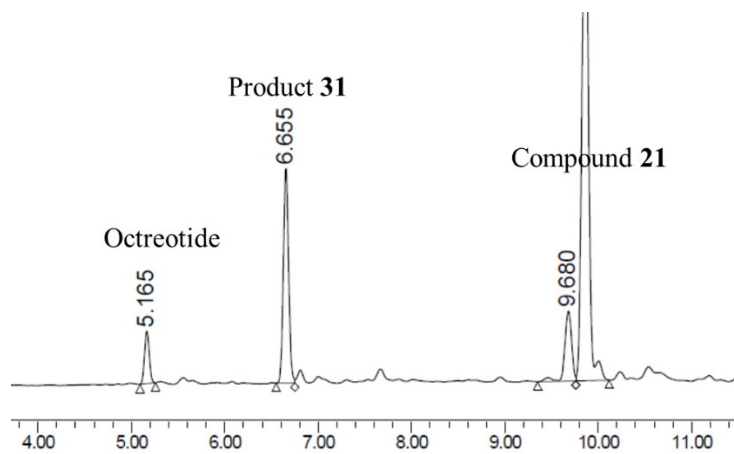

**Fig. 4SD** HPLC of the reaction that compound **21** conjugated with octreotide to produce **31**

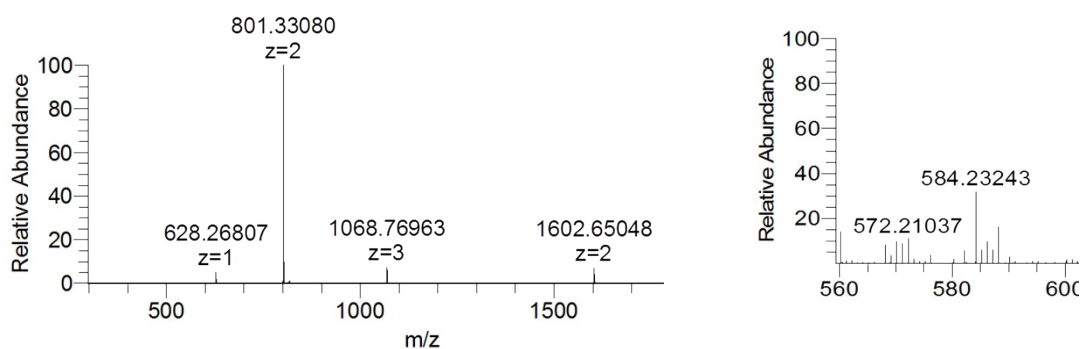

**Fig. 4SE** The HRESIMS and MS<sup>2</sup> of compound **31**

<sup>1</sup>H NMR of compound **31**

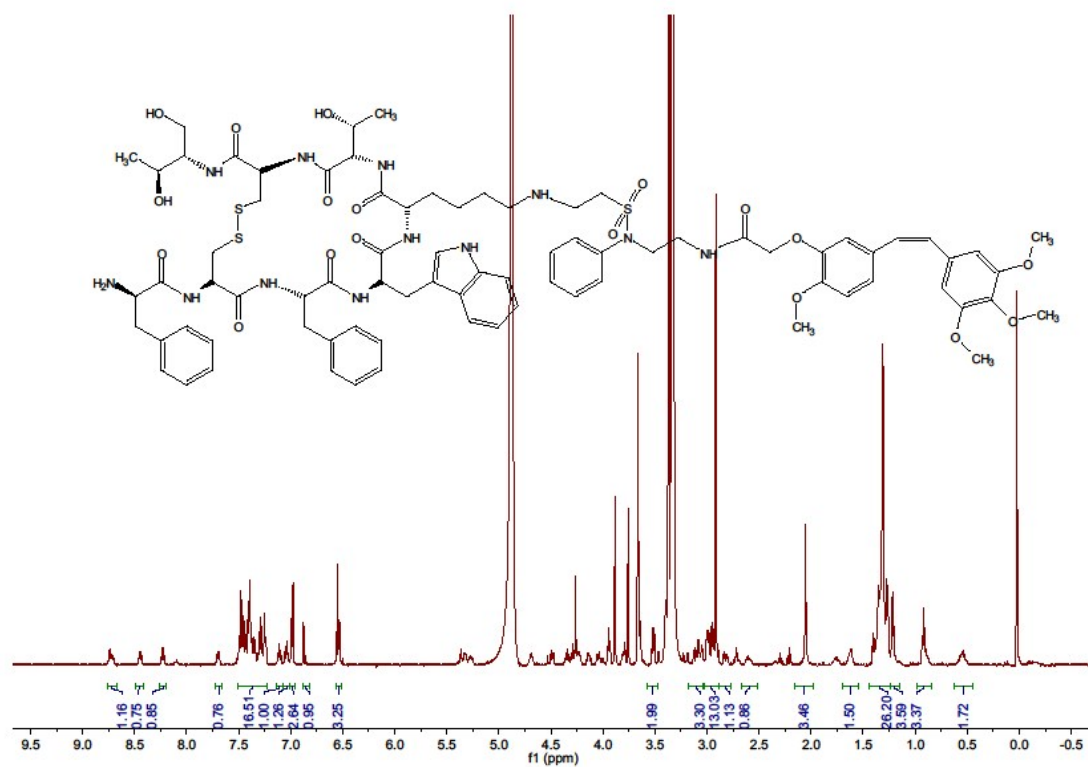

#### General procedure for the synthesis of compounds **32** and **33**

The procedure was same to the synthesis of compound **19**. The yields of compound **32** and **33** were determined by HPLC (For compound **32**: 45% yield, 79% yield based on recovered insulin; For compound **33**: 92% yield, 96% yield based on recovered insulin;).

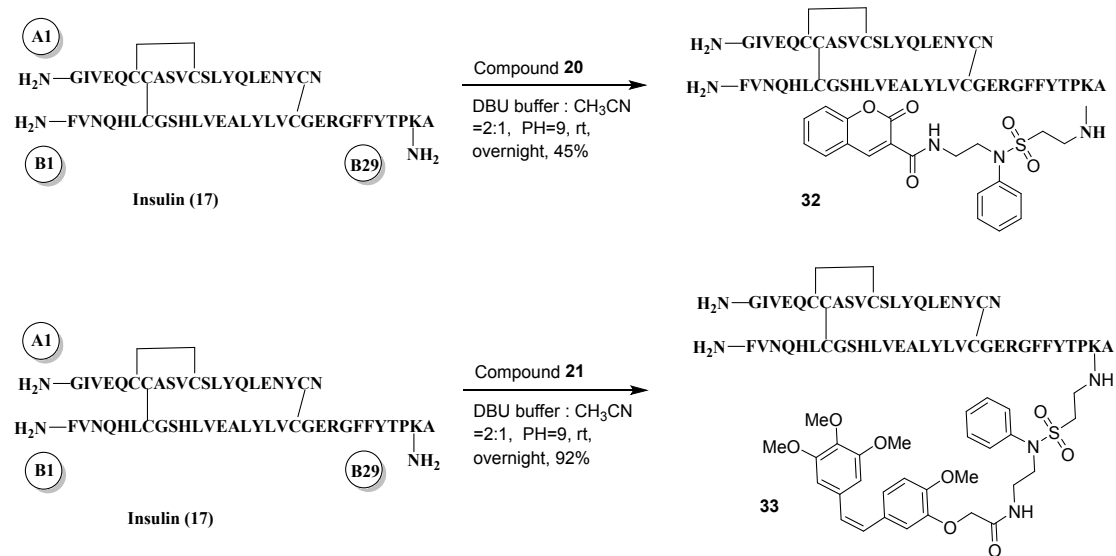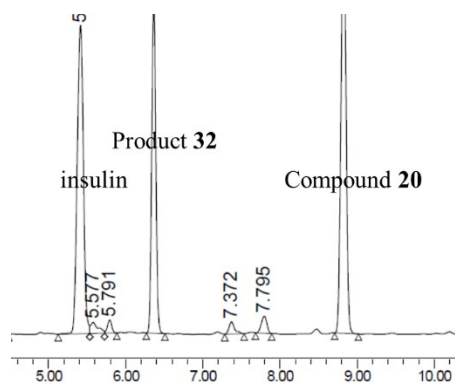

**Fig. 5SA** HPLC of the reaction that compound **20** conjugated with insulin to produce **32**

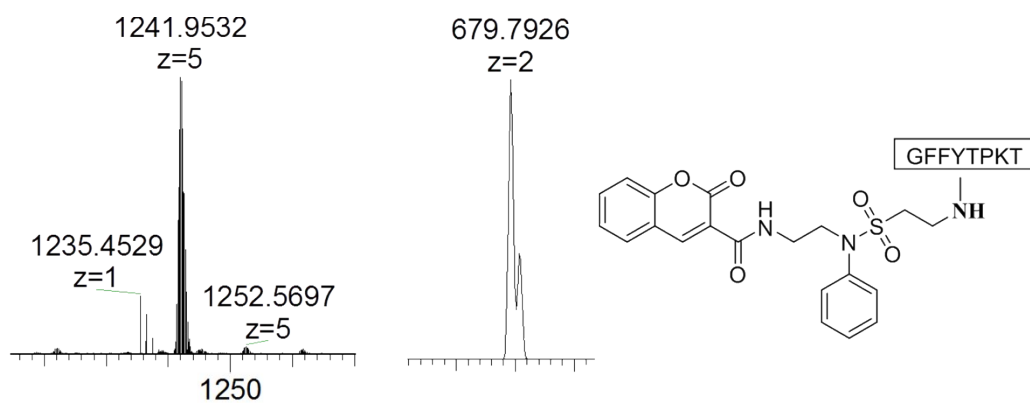

Compound **25**  $m/z$  1241.9532  $[\text{M}+5\text{H}]^{5+}$  Peptide fragment  $m/z$  679.7926  $[\text{M}+2\text{H}]^{2+}$

**Fig. 5SB** HRESIMS and  $\text{MS}^2$  of compound **32**

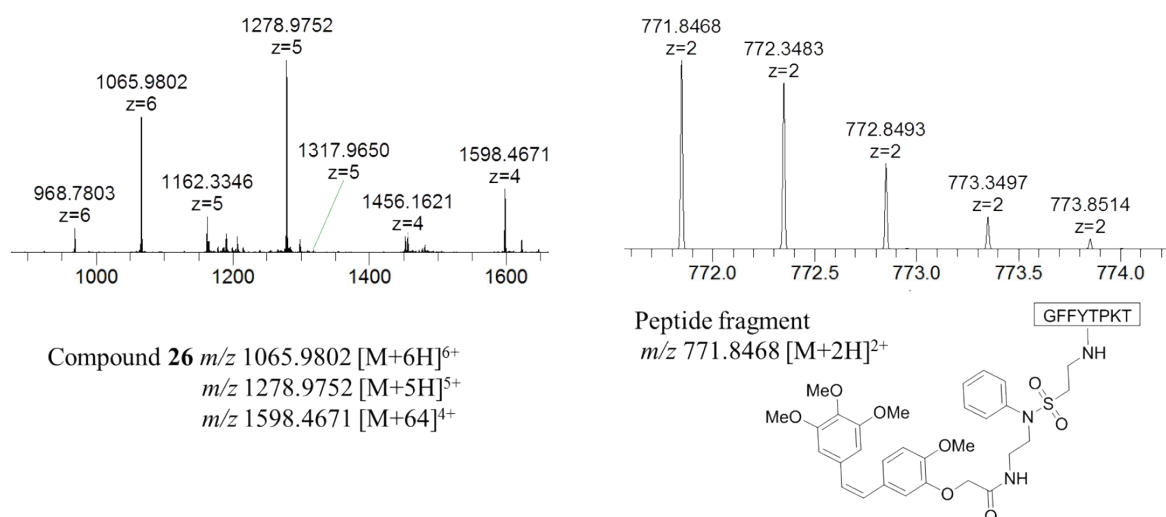

**Fig. 5SC** The HRESIMS and MS<sup>2</sup> of compound **33**

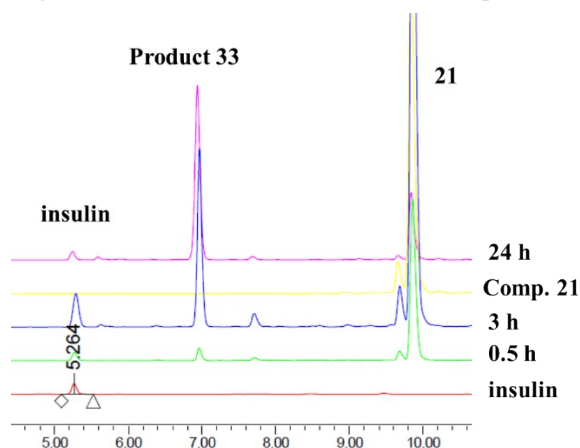

**Fig. 5SD** HPLC of the reaction that compound **21** conjugated with insulin to produce **33**

**Table S1** Conditions tested during optimization

| Entry | Compound | PH          | Buffer                                            | Yield       | Selectivity     |
|-------|----------|-------------|---------------------------------------------------|-------------|-----------------|
| 1     | <b>1</b> | 7.01        | DABCO+H <sub>3</sub> PO <sub>4</sub>              | \           | \               |
| 2     | <b>2</b> | 7.01        | DABCO+H <sub>3</sub> PO <sub>4</sub>              | \           | \               |
| 3     | <b>3</b> | 7.01        | DABCO+H <sub>3</sub> PO <sub>4</sub>              | 10.2        | 3:1             |
| 4     | <b>4</b> | 7.01        | DABCO+H <sub>3</sub> PO <sub>4</sub>              | 7.9         | 2:1             |
| 5     | <b>5</b> | 7.01        | DABCO+H <sub>3</sub> PO <sub>4</sub>              | 16.6        | >50:1           |
| 6     | <b>6</b> | 7.01        | DABCO+H <sub>3</sub> PO <sub>4</sub>              | 13.4        | >50:1           |
| 7     | <b>7</b> | <b>7.01</b> | <b>DABCO+H<sub>3</sub>PO<sub>4</sub></b>          | <b>30.2</b> | <b>&gt;50:1</b> |
| 8     | 7        | 7.00        | Et <sub>3</sub> N+ H <sub>3</sub> PO <sub>4</sub> | 0.7         | \               |
| 9     | 7        | 7.01        | TBD+H <sub>3</sub> PO <sub>4</sub>                | 1.9         | \               |
| 10    | 7        | 7.09        | MTBD+H <sub>3</sub> PO <sub>4</sub>               | 2.1         | \               |
| 11    | 7        | 7.02        | DBU+H <sub>3</sub> PO <sub>4</sub>                | 1.1         | \               |
| 12    | 7        | 6.99        | PBS                                               | 8.2         | 2:1             |
| 13    | 7        | 8.23        | NH <sub>4</sub> HCO <sub>3</sub>                  | 0.8         | \               |
| 14    | 7        | 8.45        | NaHCO <sub>3</sub>                                | 1.7         | \               |
| 15    | 7        | 8.04        | DABCO+H <sub>3</sub> PO <sub>4</sub>              | 31.4        | 20:1            |

---

|    |   |       |                                      |      |     |
|----|---|-------|--------------------------------------|------|-----|
| 16 | 7 | 9.09  | DABCO+H <sub>3</sub> PO <sub>4</sub> | 26.6 | 5:1 |
| 17 | 7 | 10.37 | DABCO                                | 20.5 | 4:1 |

---
